# Supplementary material for: The power of the smallest: The inhibitory activity of microbial volatile organic compounds against phytopathogens
Source: PubMed Central journal article supplement (PMC9845590; doi:10.3389/fmicb.2022.951130), 2023-01-04
Supplement: Table_1.pdf [file Table_1.pdf]

**Supplementary table 1.** Microbial volatile organic compounds (VOCs) validated (*in vitro* and/or *in vivo*) as bioactive inhibitors of phytopathogens.

| Compounds                        | Chemical classes                                                                            | PubChem ID | mVOC* | Identified in | phytopathogen inhibited                        | Inhibitory concentrations                       | References              |
|----------------------------------|---------------------------------------------------------------------------------------------|------------|-------|---------------|------------------------------------------------|-------------------------------------------------|-------------------------|
| 1-(2-aminophenyl)-ethanone       | benzenoid / ketone / amine / nitrogen compound                                              | 11086      | Y     | Bacteria      | <i>Peronophythora litchii</i>                  | EC50 = 170.3 mg/L                               | Zheng et al., 2019a     |
| 1,2-benzisothiazol-3-(2H)-one    | sulfur compound / benzenoid / lactame / thiazole / isothiazole / ketone / nitrogen compound | 17520      | Y     | Bacteria      | <i>Ralstonia solanacearum</i>                  | 5.0 mg = ±60%                                   | Tahir et al., 2017a     |
| 1,3,5-trichloro-2-methoxybenzene | benzenoid / ester / halogenated compound                                                    | 6884       | Y     | Bacteria      | <i>Rhizoctonia solani</i>                      | 100mM and 1M = 100%                             | Cordovez et al., 2015   |
| 1,3-butadiene                    | alkene                                                                                      | 7845       | N     | Bacteria      | <i>Ra. solanacearum</i>                        | 6.14 mg = 40%                                   | Tahir et al., 2017a     |
| 1,3-pentadiene                   | alkene                                                                                      | 62204      | Y     | Bacteria      | <i>Botrytis cinerea</i>                        | 0.67 µL/mL = 63%                                | Gotor-Vila et al., 2017 |
| 10-methyldodec-2-en-4-olide      | lactone                                                                                     | 21778198   | N     | Bacteria      | <i>Aeromicrobium marinum</i>                   | 25 µg (12 mM) = 8 mm of inhibition zone         | Dickschat et al., 2005  |
| 10-methyldodec-2-en-4-olide      | lactone                                                                                     | 21778198   | N     | Bacteria      | <i>Mesorhizobium tianshanense</i>              | 25 µg (12 mM) = 9 mm of inhibition zone         | Dickschat et al., 2005  |
| 10-methyldodec-2-en-4-olide      | lactone                                                                                     | 21778198   | N     | Bacteria      | <i>Tenacibaculum mesophilum</i>                | 25 µg (12 mM) = +40 mm of inhibition zone       | Dickschat et al., 2005  |
| 10-methyldodec-2-en-4-olide      | lactone                                                                                     | 21778198   | N     | Bacteria      | <i>Zobellia russellii</i>                      | 25 µg (12 mM) = 24 mm of inhibition zone        | Dickschat et al., 2005  |
| 1-butanamine                     | amine / nitrogen compound                                                                   | 8007       | Y     | Bacteria      | <i>Pochonia chlamydosporia</i>                 | spore: 21 mg/L ≥ 99%<br>mycelium: 44 mg/L ≥ 99% | Zou et al., 2007        |
| 1-butanamine                     | amine / nitrogen compound                                                                   | 8007       | Y     | Bacteria      | <i>Paecilomyces lilacinus</i>                  | spore: 20 mg/L ≥ 99%<br>mycelium: 32 mg/L       | Zou et al., 2007        |
| 1-decanol                        | alcohol                                                                                     | 8174       | Y     | Bacteria      | <i>Fusarium oxysporum</i> f. sp. <i>niveum</i> | 200 µL (concentration N.M.) = 40%               | Raza et al., 2015       |
| 1-decene                         | alkene                                                                                      | 13381      | Y     | Bacteria      | <i>Po. chlamydosporia</i>                      | spore: 6 mg/L ≥ 99%<br>mycelium: 37 mg/L ≥ 99%  | Zou et al., 2007        |
| 1-decene                         | alkene                                                                                      | 13381      | Y     | Bacteria      | <i>Pa. lilacinus</i>                           | spore: 6 mg/L ≥ 99%<br>mycelium: 22 mg/L ≥ 99%  | Zou et al., 2007        |

| Compounds            | Chemical classes | PubChem ID | mVOC* | Identified in | phytopathogen inhibited                  | Inhibitory concentrations                                    | References             |
|----------------------|------------------|------------|-------|---------------|------------------------------------------|--------------------------------------------------------------|------------------------|
| 1-dodecanol          | alcohol          | 8193       | Y     | Bacteria      | <i>F. oxysporum</i> f. sp. <i>niveum</i> | 200 µL (concentration N.M.) = 30%                            | Raza et al., 2015      |
| 1-hexadecanol        | alcohol          | 2682       | Y     | Bacteria      | <i>Bursaphelenchus xylophilus</i>        | 2.0 mmol = 9%                                                | Gu et al., 2007        |
| 1-hexadecanol        | alcohol          | 2682       | Y     | Bacteria      | <i>Colletotrichum gloeosporioides</i>    | 200 µL (200 µL/mL liquid or 100 mg/mL solid compounds) = 35% | Rajaofera et al., 2019 |
| 1-methyl-naphthalene | benzenoid        | 7002       | Y     | Bacteria      | <i>F. oxysporum</i> f. sp. <i>niveum</i> | 200 µL (concentration N.M.) = 95%                            | Raza et al., 2015      |
| 1-methyl-naphthalene | benzenoid        | 7002       | Y     | Bacteria      | <i>Ra. solanacearum</i>                  | 40 µg/100µL (methanol) = ±50%                                | Raza et al., 2015      |
| 1-octanol            | alcohol          | 957        | Y     | Bacteria      | <i>Monilinia fruticola</i>               | EC50 = 4.77 x 10 <sup>-5</sup> mol/L                         | Gao et al., 2018       |
| 1-octen-3-ol         | alcohol / alkene | 18827      | Y     | Bacteria      | <i>Alternaria brassicae</i>              | 7.5 mg = mycelia reduced in 45.2 mm (±65%)                   | Zhao et al., 2011      |
| 1-octen-3-ol         | alcohol / alkene | 18827      | Y     | Bacteria      | <i>Bo. cinerea</i>                       | 5.0 mg = mycelia reduced in 64.4 mm (±90%)                   | Zhao et al., 2011      |
| 1-octen-3-ol         | alcohol / alkene | 18827      | Y     | Bacteria      | <i>Colletotrichum capsici</i>            | 7.5 mg = mycelia reduced in 38.5 mm (±59%)                   | Zhao et al., 2011      |
| 1-octen-3-ol         | alcohol / alkene | 18827      | Y     | Bacteria      | <i>F. oxysporum</i>                      | 7.5 mg = mycelia reduced in 46.3 mm (±69%)                   | Zhao et al., 2011      |
| 1-octen-3-ol         | alcohol / alkene | 18827      | Y     | Bacteria      | <i>Phytophthora capsici</i>              | 7.5 mg = mycelia reduced in 53.3 mm (±79%)                   | Zhao et al., 2011      |
| 1-octen-3-ol         | alcohol / alkene | 18827      | Y     | Bacteria      | <i>Phytophthora melonis</i>              | 7.5 mg = mycelia reduced in 59 mm (±89%)                     | Zhao et al., 2011      |
| 1-octen-3-ol         | alcohol / alkene | 18827      | Y     | Bacteria      | <i>Pestalotiopsis photiniae</i>          | 7.5 mg = mycelia reduced in 59.2 mm (±85%)                   | Zhao et al., 2011      |
| 1-octen-3-ol         | alcohol / alkene | 18827      | Y     | Bacteria      | <i>Rh. solani</i>                        | 7.5 mg = mycelia reduced in 68.4 mm (±91%)                   | Zhao et al., 2011      |

| Compounds                | Chemical classes                                     | PubChem ID | mVOC* | Identified in | phytopathogen inhibited                            | Inhibitory concentrations                                              | References                   |
|--------------------------|------------------------------------------------------|------------|-------|---------------|----------------------------------------------------|------------------------------------------------------------------------|------------------------------|
| 1-octen-3-ol             | alcohol / alkene                                     | 18827      | Y     | Fungi         | <i>Bo. cinerea</i>                                 | 10 $\mu$ L (0.1M) = $\pm$ 2mm (reduction of lesion size)               | Kishimoto et al., 2007       |
| 1-undecanol              | alcohol                                              | 8184       | Y     | Bacteria      | <i>Ra. solanacearum</i>                            | 40 $\mu$ g/100 $\mu$ L (methanol) = $\pm$ 50%                          | Raza et al., 2016a           |
| 1-undecene               | alkene                                               | 13190      | Y     | Bacteria      | <i>Thielaviopsis ethacetica</i>                    | 5 mM = 100%                                                            | Freitas et al., 2022         |
| 2,3,5-trimethyl pyrazine | pyrazine / nitrogen compound / heterocyclic compound | 26808      | Y     | Bacteria      | <i>Fusarium solani</i>                             | 200 $\mu$ L (standard) = 100%                                          | Guevara-Avenida et al., 2019 |
| 2,3-butanediol           | alcohol                                              | 262        | Y     | Bacteria      | <i>Erwinia carotovora</i> subsp. <i>carotovora</i> | 0.2 pg – 20 $\mu$ g = reduced symptomatic leaves in <i>Arabidopsis</i> | Ryu et al., 2004             |
| 2,4-di-tert-butyl phenol | phenol                                               | 7311       | N     | Bacteria      | <i>Alternaria solani</i>                           | 80 $\mu$ L (standard) = 89.14%                                         | Gao et al., 2017             |
| 2,4-di-tert-butyl phenol | phenol                                               | 7311       | N     | Bacteria      | <i>Bo. cinerea</i>                                 | 80 $\mu$ L (standard) = 81.18%                                         | Gao et al., 2017             |
| 2,4-di-tert-butyl phenol | alcohol / benzenoid                                  | 7311       | Y     | Bacteria      | <i>Co. gloeosporioides</i>                         | EC50 = 1.26 x 10 <sup>-2</sup> mol/L                                   | Gao et al., 2018             |
| 2,4-di-tert-butyl phenol | alcohol / benzenoid                                  | 7311       | Y     | Bacteria      | <i>Mo. fructicola</i>                              | EC50 = 9.9 x 10 <sup>-4</sup> mol/L                                    | Gao et al., 2018             |
| 2,5-dimethyl pyrazine    | pyrazine / nitrogen compound / heterocyclic compound | 31252      | Y     | Bacteria      | <i>Athelia rolfsii</i>                             | EC95 = 400.2 $\mu$ g/cm <sup>3</sup>                                   | Agisha et al., 2019          |
| 2,5-dimethyl pyrazine    | pyrazine / nitrogen compound / heterocyclic compound | 31252      | Y     | Bacteria      | <i>Al. solani</i>                                  | 80 $\mu$ L (standard) = 87.5%                                          | Gao et al., 2017             |
| 2,5-dimethyl pyrazine    | pyrazine / nitrogen compound / heterocyclic compound | 31252      | Y     | Bacteria      | <i>Bo. cinerea</i>                                 | 80 $\mu$ L (standard) = 100%                                           | Gao et al., 2017             |
| 2,5-dimethyl pyrazine    | pyrazine / nitrogen compound / heterocyclic compound | 31252      | Y     | Bacteria      | <i>Co. gloeosporioides</i>                         | EC95 = 571.0 $\mu$ g/cm <sup>3</sup>                                   | Agisha et al., 2019          |
| 2,5-dimethyl pyrazine    | pyrazine / nitrogen compound / heterocyclic compound | 31252      | Y     | Bacteria      | <i>Giberella moliniformis</i>                      | EC95 = 1058 $\mu$ g/cm <sup>3</sup>                                    | Agisha et al., 2019          |

| Compounds             | Chemical classes                                     | PubChem ID | mVOC* | Identified in | phytopathogen inhibited         | Inhibitory concentrations       | References          |
|-----------------------|------------------------------------------------------|------------|-------|---------------|---------------------------------|---------------------------------|---------------------|
| 2,5-dimethyl pyrazine | pyrazine / nitrogen compound / heterocyclic compound | 31252      | Y     | Bacteria      | <i>Magnaporthe oryzae</i>       | EC95 = 32217 µg/cm <sup>3</sup> | Agisha et al., 2019 |
| 2,5-dimethyl pyrazine | pyrazine / nitrogen compound / heterocyclic compound | 31252      | Y     | Bacteria      | <i>Ma. oryzae</i>               | 1 mL (672 µg/mL) = 74%          | Munjal et al., 2016 |
| 2,5-dimethyl pyrazine | pyrazine / nitrogen compound / heterocyclic compound | 31252      | Y     | Bacteria      | <i>Phyt. capsici</i>            | EC95 = 748.1 µg/cm <sup>3</sup> | Agisha et al., 2019 |
| 2,5-dimethyl pyrazine | pyrazine / nitrogen compound / heterocyclic compound | 31252      | Y     | Bacteria      | <i>Phyt. capsici</i>            | 1 mL (504 µg/mL) = 100%         | Munjal et al., 2016 |
| 2,5-dimethyl pyrazine | pyrazine / nitrogen compound / heterocyclic compound | 31252      | Y     | Bacteria      | <i>Per. litchii</i>             | EC50 = 744.5 mg/L               | Zheng et al., 2019a |
| 2,5-dimethyl pyrazine | pyrazine / nitrogen compound / heterocyclic compound | 31252      | Y     | Bacteria      | <i>Pythium myriotilum</i>       | EC95 = 185.0 µg/cm <sup>3</sup> | Agisha et al., 2019 |
| 2,5-dimethyl pyrazine | pyrazine / nitrogen compound / heterocyclic compound | 31252      | Y     | Bacteria      | <i>Pythium ultimum</i>          | 10 mg > 50%                     | Vlassi et al., 2020 |
| 2,5-dimethyl pyrazine | pyrazine / nitrogen compound / heterocyclic compound | 31252      | Y     | Bacteria      | <i>Ra. pseudosolanacearum</i>   | 679 µg/cm <sup>3</sup> = 80%    | Agisha et al., 2019 |
| 2,5-dimethyl pyrazine | pyrazine / nitrogen compound / heterocyclic compound | 31252      | Y     | Bacteria      | <i>Ra. solanacearum</i>         | 1 mL (672 µg/mL) = 80%          | Munjal et al., 2016 |
| 2,5-dimethyl pyrazine | pyrazine / nitrogen compound / heterocyclic compound | 31252      | Y     | Bacteria      | <i>Rh. solani</i>               | EC95 = 219.3 µg/cm <sup>3</sup> | Agisha et al., 2019 |
| 2,5-dimethyl pyrazine | pyrazine / nitrogen compound / heterocyclic compound | 31252      | Y     | Bacteria      | <i>Rh. solani</i>               | 10 mg > 50%                     | Vlassi et al., 2020 |
| 2,5-dimethyl pyrazine | pyrazine / nitrogen compound / heterocyclic compound | 31252      | Y     | Bacteria      | <i>Sclerotinia sclerotiorum</i> | 10 mg ≈ 80%                     | Vlassi et al., 2020 |
| 2-decanol             | alcohol                                              | 14254      | Y     | Bacteria      | <i>Ra. solanacearum</i>         | 40 µg/100µL (methanol) = ±50%   | Raza et al., 2016a  |

| Compounds                     | Chemical classes             | PubChem ID | mVOC* | Identified in | phytopathogen inhibited        | Inhibitory concentrations       | References                    |
|-------------------------------|------------------------------|------------|-------|---------------|--------------------------------|---------------------------------|-------------------------------|
| 2-decanone                    | ketone                       | 12741      | Y     | Bacteria      | <i>Colletotrichum acutatum</i> | 80 µL (standard) = 61%          | Che et al., 2017              |
| 2-decanone                    | ketone                       | 12741      | Y     | Bacteria      | <i>F. solani</i>               | 200 µL (standard) = 100%        | Guevara-Avendaño et al., 2019 |
| 2-dodecanone                  | ketone                       | 22556      | Y     | Bacteria      | <i>F. solani</i>               | 200 µL (standard) = 38%         | Guevara-Avendaño et al., 2019 |
| 2-ethyl pyrazine              | pyrazine                     | 26331      | N     | Bacteria      | <i>Ma. oryzae</i>              | 1 mL (672 µg/mL) = 100%         | Munjal et al., 2016           |
| 2-ethyl pyrazine              | pyrazine                     | 26331      | N     | Bacteria      | <i>Phyt. capsici</i>           | 1 mL (504 µg/mL) = 100%         | Munjal et al., 2016           |
| 2-ethyl pyrazine              | pyrazine                     | 26331      | N     | Bacteria      | <i>Ra. solanacearum</i>        | 1 mL (672 µg/mL) = 55.12%       | Munjal et al., 2016           |
| 2-ethyl-3,6-dimethyl pyrazine | pyrazine / nitrogen compound | 25916      | Y     | Bacteria      | <i>At. rolfsii</i>             | EC95 = 85.0 µg/cm <sup>3</sup>  | Agisha et al., 2019           |
| 2-ethyl-3,6-dimethyl pyrazine | pyrazine / nitrogen compound | 25916      | Y     | Bacteria      | <i>Co. gloeosporioides</i>     | EC95 = 108.0 µg/cm <sup>3</sup> | Agisha et al., 2019           |
| 2-ethyl-3,6-dimethyl pyrazine | pyrazine / nitrogen compound | 25916      | Y     | Bacteria      | <i>G. moliniformis</i>         | EC95 = 137.3 µg/cm <sup>3</sup> | Agisha et al., 2019           |
| 2-ethyl-3,6-dimethyl pyrazine | pyrazine / nitrogen compound | 25916      | Y     | Bacteria      | <i>Ma. oryzae</i>              | EC95 = 937.9 µg/cm <sup>3</sup> | Agisha et al., 2019           |
| 2-ethyl-3,6-dimethyl pyrazine | pyrazine / nitrogen compound | 25916      | Y     | Bacteria      | <i>Phyt. capsici</i>           | EC95 = 382.1 µg/cm <sup>3</sup> | Agisha et al., 2019           |
| 2-ethyl-3,6-dimethyl pyrazine | pyrazine / nitrogen compound | 25916      | Y     | Bacteria      | <i>Py. myriotilum</i>          | EC95 = 78.2 µg/cm <sup>3</sup>  | Agisha et al., 2019           |
| 2-ethyl-3,6-dimethyl pyrazine | pyrazine / nitrogen compound | 25916      | Y     | Bacteria      | <i>Ra. pseudosolanacearum</i>  | 679 µg/cm <sup>3</sup> = 93%    | Agisha et al., 2019           |
| 2-ethyl-3,6-dimethyl pyrazine | pyrazine / nitrogen compound | 25916      | Y     | Bacteria      | <i>Rh. solani</i>              | EC95 = 49.5 µg/cm <sup>3</sup>  | Agisha et al., 2019           |
| 2-ethyl-3-methoxy pyrazine    | pyrazine / nitrogen compound | 33135      | **    | Bacteria      | <i>Py. ultimum</i>             | 10 mg > 50%                     | Vlassi et al., 2020           |
| 2-ethyl-3-methoxy pyrazine    | pyrazine / nitrogen compound | 33135      | **    | Bacteria      | <i>Rh. solani</i>              | 10 mg > 50%                     | Vlassi et al., 2020           |
| 2-ethyl-3-methoxy pyrazine    | pyrazine / nitrogen compound | 33135      | **    | Bacteria      | <i>S. sclerotiorum</i>         | 10 mg ≈ 90%                     | Vlassi et al., 2020           |

| Compounds                 | Chemical classes                                     | PubChem ID | mVOC* | Identified in | phytopathogen inhibited       | Inhibitory concentrations       | References            |
|---------------------------|------------------------------------------------------|------------|-------|---------------|-------------------------------|---------------------------------|-----------------------|
| 2-ethyl-3-methyl pyrazine | pyrazine                                             | 27457      | N     | Bacteria      | <i>Ma. oryzae</i>             | 1 mL (168 µg/mL) = 100%         | Munjal et al., 2016   |
| 2-ethyl-3-methyl pyrazine | pyrazine                                             | 27457      | N     | Bacteria      | <i>Meloidogyne</i> sp.        | 20 µL (standard) = 50%          | Wolfgang et al., 2019 |
| 2-ethyl-3-methyl pyrazine | pyrazine                                             | 27457      | N     | Bacteria      | <i>Phyt. capsici</i>          | 1 mL (168 µg/mL) = 100%         | Munjal et al., 2016   |
| 2-ethyl-3-methyl pyrazine | pyrazine                                             | 27457      | N     | Bacteria      | <i>Ra. solanacearum</i>       | 1 mL (672 µg/mL) = 96%          | Munjal et al., 2016   |
| 2-ethyl-5-methyl pyrazine | pyrazine / nitrogen compound / heterocyclic compound | 25915      | Y     | Bacteria      | <i>At. rolfsii</i>            | EC95 = 145.3 µg/cm <sup>3</sup> | Agisha et al., 2019   |
| 2-ethyl-5-methyl pyrazine | pyrazine / nitrogen compound / heterocyclic compound | 25915      | Y     | Bacteria      | <i>Co. gloeosporioides</i>    | EC95 = 232.2 µg/cm <sup>3</sup> | Agisha et al., 2019   |
| 2-ethyl-5-methyl pyrazine | pyrazine / nitrogen compound / heterocyclic compound | 25915      | Y     | Bacteria      | <i>G. moliniformis</i>        | EC95 = 290.4 µg/cm <sup>3</sup> | Agisha et al., 2019   |
| 2-ethyl-5-methyl pyrazine | pyrazine / nitrogen compound / heterocyclic compound | 25915      | Y     | Bacteria      | <i>Ma. oryzae</i>             | EC95 = 937.9 µg/cm <sup>3</sup> | Agisha et al., 2019   |
| 2-ethyl-5-methyl pyrazine | pyrazine / nitrogen compound / heterocyclic compound | 25915      | Y     | Bacteria      | <i>Phyt. capsici</i>          | EC95 = 491.0 µg/cm <sup>3</sup> | Agisha et al., 2019   |
| 2-ethyl-5-methyl pyrazine | pyrazine / nitrogen compound / heterocyclic compound | 25915      | Y     | Bacteria      | <i>Py. myriotilum</i>         | EC95 = 95.0 µg/cm <sup>3</sup>  | Agisha et al., 2019   |
| 2-ethyl-5-methyl pyrazine | pyrazine / nitrogen compound / heterocyclic compound | 25915      | Y     | Bacteria      | <i>Ra. pseudosolanacearum</i> | 679 µg/cm <sup>3</sup> = 83%    | Agisha et al., 2019   |
| 2-ethyl-5-methyl pyrazine | pyrazine / nitrogen compound / heterocyclic compound | 25915      | Y     | Bacteria      | <i>Rh. solani</i>             | EC95 = 75.3 µg/cm <sup>3</sup>  | Agisha et al., 2019   |
| 2-ethylhexan-1-ol         | alcohol                                              | 7720       | Y     | Bacteria      | <i>Co. acutatum</i>           | 10 µL (standard) = 100%         | Che et al., 2017      |
| 2-ethylhexan-1-ol         | alcohol                                              | 7720       | Y     | Bacteria      | <i>Per. litchii</i>           | EC50 = 180.1 mg/L               | Zheng et al., 2019a   |

| Compounds                      | Chemical classes             | PubChem ID | mVOC* | Identified in | phytopathogen inhibited                  | Inhibitory concentrations                  | References                  |
|--------------------------------|------------------------------|------------|-------|---------------|------------------------------------------|--------------------------------------------|-----------------------------|
| 2-ethylhexan-1-ol              | alcohol                      | 7720       | Y     | Bacteria      | <i>Phyt. capsici</i>                     | 10 µg/mL (volume N.M.) = ± 60% inhibition  | Syed-Ab-Rahman et al., 2019 |
| 2-ethylhexan-1-ol              | alcohol                      | 7720       | Y     | Bacteria      | <i>S. sclerotiorum</i>                   | 100 and 150 µL = 100%                      | Fernando et al., 2005       |
| 2-heptanone                    | ketone                       | 8051       | Y     | Bacteria      | <i>Agrobacterium tumefaciens</i>         | 100 µmol = 100%                            | Popova et al., 2014         |
| 2-heptanone                    | ketone                       | 8051       | Y     | Bacteria      | <i>Ag. tumefaciens</i>                   | 75 µmol = 100%                             | Plyuta et al., 2016         |
| 2-heptanone                    | ketone                       | 8051       | Y     | Bacteria      | <i>Phyt. capsici</i>                     | 10 µg/mL (volume N.M.) = ± 60%             | Syed-Ab-Rahman et al., 2019 |
| 2-heptanone                    | ketone                       | 8051       | Y     | Bacteria      | <i>Synechococcus</i> sp.                 | 100 µmol = 100%                            | Popova et al., 2014         |
| 2-hexadecanol                  | alcohol                      | 85779      | N     | Bacteria      | <i>F. oxysporum</i> f. sp. <i>niveum</i> | 200 µL (concentration N.M.) = 60%          | Raza et al., 2015           |
| 2-isobutyl-3-methyl pyrazine   | pyrazine                     | 26333      | N     | Bacteria      | <i>Meloidogyne</i> sp.                   | 20 µL (standard) = 68%                     | Wolfgang et al., 2019       |
| 2-isopropyl-3-methoxy pyrazine | pyrazine                     | 33166      | **    | Bacteria      | <i>Py. ultimum</i>                       | 10 mg > 40%                                | Vlassi et al., 2020         |
| 2-isopropyl-3-methoxy pyrazine | pyrazine                     | 33166      | **    | Bacteria      | <i>Rh. solani</i>                        | 7.5 mg > 10%                               | Vlassi et al., 2020         |
| 2-isopropyl-3-methoxy pyrazine | pyrazine                     | 33166      | **    | Bacteria      | <i>S. sclerotiorum</i>                   | 10 mg ≈ 90%                                | Vlassi et al., 2020         |
| 2-methoxy-3-methyl pyrazine    | pyrazine                     | 17898      | N     | Bacteria      | <i>Meloidogyne</i> sp.                   | 175 nmol = 76%                             | Wolfgang et al., 2019       |
| 2-methyl butyric acid          | carboxylic acid / ester      | 8314       | Y     | Bacteria      | <i>Colletotrichum lindemuthianum</i>     | 10 µL (102.3 g/mol) = up to 94% inhibition | Martins et al., 2019        |
| 2-methyl pyrazine              | pyrazine / nitrogen compound | 7976       | Y     | Bacteria      | <i>At. rolf sii</i>                      | EC95 = 578.3 µg/cm <sup>3</sup>            | Agisha et al., 2019         |
| 2-methyl pyrazine              | pyrazine / nitrogen compound | 7976       | Y     | Bacteria      | <i>Co. gloeosporioides</i>               | EC95 = 519.2 µg/cm <sup>3</sup>            | Agisha et al., 2019         |
| 2-methyl pyrazine              | pyrazine / nitrogen compound | 7976       | Y     | Bacteria      | <i>G. moliniformis</i>                   | EC95 = 1624 µg/cm <sup>3</sup>             | Agisha et al., 2019         |
| 2-methyl pyrazine              | pyrazine / nitrogen compound | 7976       | Y     | Bacteria      | <i>Ma. oryzae</i>                        | 1 mL (672 µg/mL) = 100%                    | Munjaj et al., 2016         |

| Compounds          | Chemical classes             | PubChem ID | mVOC* | Identified in | phytopathogen inhibited                  | Inhibitory concentrations          | References                 |
|--------------------|------------------------------|------------|-------|---------------|------------------------------------------|------------------------------------|----------------------------|
| 2-methyl pyrazine  | pyrazine / nitrogen compound | 7976       | Y     | Bacteria      | <i>Ma. oryzae</i>                        | EC95 = 1802 µg/cm <sup>3</sup>     | Agisha et al., 2019        |
| 2-methyl pyrazine  | pyrazine / nitrogen compound | 7976       | Y     | Bacteria      | <i>Phyt. capsici</i>                     | EC95 = 1571 µg/cm <sup>3</sup>     | Agisha et al., 2019        |
| 2-methyl pyrazine  | pyrazine / nitrogen compound | 7976       | Y     | Bacteria      | <i>Phyt. capsici</i>                     | 1 mL (672 µg/mL) = 100%            | Munjal et al., 2016        |
| 2-methyl pyrazine  | pyrazine / nitrogen compound | 7976       | Y     | Bacteria      | <i>Py. myriotilum</i>                    | EC95 = 361.1 µg/cm <sup>3</sup>    | Agisha et al., 2019        |
| 2-methyl pyrazine  | pyrazine / nitrogen compound | 7976       | Y     | Bacteria      | <i>Ra. solanacearum</i>                  | 1 mL (672 µg/mL) = 32%             | Munjal et al., 2016        |
| 2-methyl pyrazine  | pyrazine / nitrogen compound | 7976       | Y     | Bacteria      | <i>Rh. solani</i>                        | EC95 = 207.8 µg/cm <sup>3</sup>    | Agisha et al., 2019        |
| 2-methyl pyrazine  | pyrazine / nitrogen compound | 7976       | Y     | Bacteria      | <i>Ra. pseudosolanacearum</i>            | 679 µg/cm <sup>3</sup> = 32%       | Agisha et al., 2019        |
| 2-methyl-1-butanol | alcohol                      | 8723       | Y     | Fungi         | <i>Bo. cinerea</i>                       | EC50 = 1.38 µL/mL                  | Di Francesco et al., 2015  |
| 2-methyl-1-butanol | alcohol                      | 8723       | Y     | Fungi         | <i>Co. acutatum</i>                      | EC50 = 1.27 µL/mL                  | Di Francesco et al., 2015  |
| 2-methyl-1-butanol | alcohol                      | 8723       | Y     | Fungi         | <i>F. oxysporum</i>                      | 1000 µg/mL = ± 20%                 | Medina-Romero et al., 2017 |
| 2-methyl-1-butanol | alcohol                      | 8723       | Y     | Bacteria      | <i>F. oxysporum</i> f. sp. <i>niveum</i> | 200 µL (concentration N.M.) = 100% | Raza et al., 2015          |
| 2-methyl-1-butanol | alcohol                      | 8723       | Y     | Fungi         | <i>Mo. fructicola</i>                    | EC50 = 0.017 µL/mL                 | Di Francesco et al., 2020  |
| 2-methyl-1-butanol | alcohol                      | 8723       | Y     | Fungi         | <i>Monilinia fructigena</i>              | EC50 = 0.014 µL/mL                 | Di Francesco et al., 2020  |
| 2-methyl-1-butanol | alcohol                      | 8723       | Y     | Fungi         | <i>Monilinia laxa</i>                    | EC50 = 0.012 µL/mL                 | Di Francesco et al., 2020  |
| 2-methyl-1-butanol | alcohol                      | 8723       | Y     | Fungi         | <i>Monilinia polystroma</i>              | EC50 = 0.011 µL/mL                 | Di Francesco et al., 2020  |
| 2-methyl-1-butanol | alcohol                      | 8723       | Y     | Fungi         | <i>Phyllosticta citricarpa</i>           | 50 µL (concentration N.M.) = 100%  | Toffano et al., 2017       |
| 2-methyl-1-butanol | alcohol                      | 8723       | Y     | Fungi         | <i>Phytophthora crispans</i>             | EC50 = 3.67 µL/L                   | Di Francesco et al., 2017  |
| 2-methyl-1-butanol | alcohol                      | 8723       | Y     | Fungi         | <i>Penicillium digitatum</i>             | EC50 = 0.48 µL/mL                  | Di Francesco et al., 2015  |



| Compounds           | Chemical classes | PubChem ID | mVOC* | Identified in | phytopathogen inhibited     | Inhibitory concentrations            | References                |
|---------------------|------------------|------------|-------|---------------|-----------------------------|--------------------------------------|---------------------------|
| 2-methyl-1-butanol  | alcohol          | 8723       | Y     | Fungi         | <i>Penicillium expansum</i> | EC50 = 0.89 $\mu\text{L}/\text{mL}$  | Di Francesco et al., 2015 |
| 2-methyl-1-butanol  | alcohol          | 8723       | Y     | Fungi         | <i>Penicillium italicum</i> | EC50 = 0.85 $\mu\text{L}/\text{mL}$  | Di Francesco et al., 2015 |
| 2-methyl-1-propanol | alcohol          | 6560       | Y     | Fungi         | <i>Bo. cinerea</i>          | EC50 = 0.82 $\mu\text{L}/\text{mL}$  | Di Francesco et al., 2015 |
| 2-methyl-1-propanol | alcohol          | 6560       | Y     | Fungi         | <i>Co. acutatum</i>         | EC50 = 1.54 $\mu\text{L}/\text{mL}$  | Di Francesco et al., 2015 |
| 2-methyl-1-propanol | alcohol          | 6560       | Y     | Fungi         | <i>Mo. fructicola</i>       | EC50 = 0.021 $\mu\text{L}/\text{mL}$ | Di Francesco et al., 2020 |
| 2-methyl-1-propanol | alcohol          | 6560       | Y     | Fungi         | <i>Mo. fructigena</i>       | EC50 = 0.127 $\mu\text{L}/\text{mL}$ | Di Francesco et al., 2020 |
| 2-methyl-1-propanol | alcohol          | 6560       | Y     | Fungi         | <i>Mo. laxa</i>             | EC50 = 0.019 $\mu\text{L}/\text{mL}$ | Di Francesco et al., 2020 |
| 2-methyl-1-propanol | alcohol          | 6560       | Y     | Fungi         | <i>Mo. polystroma</i>       | EC50 = 0.019 $\mu\text{L}/\text{mL}$ | Di Francesco et al., 2020 |
| 2-methyl-1-propanol | alcohol          | 6560       | Y     | Fungi         | <i>Phyt. crispans</i>       | EC50 = 4.51 $\mu\text{L}/\text{L}$   | Di Francesco et al., 2017 |
| 2-methyl-1-propanol | alcohol          | 6560       | Y     | Fungi         | <i>Pen. digitatum</i>       | EC50 = 1.71 $\mu\text{L}/\text{mL}$  | Di Francesco et al., 2015 |
| 2-methyl-1-propanol | alcohol          | 6560       | Y     | Fungi         | <i>Pen. expansum</i>        | EC50 = 1.28 $\mu\text{L}/\text{mL}$  | Di Francesco et al., 2015 |
| 2-methyl-1-propanol | alcohol          | 6560       | Y     | Fungi         | <i>Pen. italicum</i>        | EC50 = 1.65 $\mu\text{L}/\text{mL}$  | Di Francesco et al., 2015 |
| 2-methyl-1-propanol | alcohol          | 6560       | Y     | Bacteria      | <i>T. ethacetica</i>        | 5 mM = 100%                          | Freitas et al., 2022      |
| 2-nonanol           | alcohol          | 12367      | Y     | Bacteria      | <i>T. ethacetica</i>        | 0.5 mM = 100%                        | Freitas et al., 2022      |
| 2-nonanone          | ketone           | 13187      | Y     | Bacteria      | <i>Ag. tumefaciens</i>      | 20 $\mu\text{mol}$ = 100%            | Plyuta et al., 2016       |
| 2-nonanone          | ketone           | 13187      | Y     | Bacteria      | <i>Ag. tumefaciens</i>      | 100 $\mu\text{mol}$ = 100%           | Popova et al., 2014       |
| 2-nonanone          | ketone           | 13187      | Y     | Fungi         | <i>Bo. cinerea</i>          | 125 $\mu\text{L}/\text{L}$ = 100%    | Guo et al., 2019          |
| 2-nonanone          | ketone           | 13187      | Y     | Bacteria      | <i>Burs. xylophilus</i>     | 0.40 mmol = 100%                     | Gu et al., 2007           |

| Compounds                                | Chemical classes                      | PubChem ID | mVOC* | Identified in  | phytopathogen inhibited                       | Inhibitory concentrations                                                                                                                                                        | References                    |
|------------------------------------------|---------------------------------------|------------|-------|----------------|-----------------------------------------------|----------------------------------------------------------------------------------------------------------------------------------------------------------------------------------|-------------------------------|
| 2-nonanone                               | ketone                                | 13187      | Y     | Bacteria       | <i>F. oxysporum</i> f. sp. <i>niveum</i>      | 200 µL (concentration N.M.) = 100%                                                                                                                                               | Raza et al., 2015             |
| 2-nonanone                               | ketone                                | 13187      | Y     | Bacteria       | <i>F. solani</i>                              | 200 µL (standard) = 100%                                                                                                                                                         | Guevara-Avendaño et al., 2019 |
| 2-nonanone                               | ketone                                | 13187      | Y     | Bacteria       | <i>Rh. solani</i>                             | 100 µmol = 100%                                                                                                                                                                  | Popova et al., 2014           |
| 2-nonanone                               | ketone                                | 13187      | Y     | Bacteria       | <i>S. sclerotiorum</i>                        | mycelium MIQ = 4.92 mg<br>sclerotia MIQ = 16.4 mg                                                                                                                                | Giorgio et al., 2015          |
| 2-nonanone                               | ketone                                | 13187      | Y     | Bacteria       | <i>Synechococcus</i> sp.                      | 100 µmol = 100%                                                                                                                                                                  | Popova et al., 2014           |
| 2-nonanone                               | ketone                                | 13187      | Y     | Bacteria       | <i>T. ethacetica</i>                          | 0.5 mM = 100%                                                                                                                                                                    | Freitas et al., 2022          |
| 2-octanol                                | alcohol                               | 20083      | Y     | Bacteria       | <i>Burs. xylophilus</i>                       | 0.06 mmol = 100%                                                                                                                                                                 | Gu et al., 2007               |
| 2-pentylfuran                            | furan / ether / heterocyclic compound | 19602      | Y     | Bacteria       | <i>F. oxysporum</i> f. sp. <i>cucumerinum</i> | 80 µL (standard) = 25%                                                                                                                                                           | Wu et al., 2015               |
| 2-pentylfuran                            | furan / ether / heterocyclic compound | 19602      | Y     | Bacteria       | <i>S. sclerotiorum</i>                        | 80 µL (standard) = 77%                                                                                                                                                           | Wu et al., 2015               |
| 2-phenethylethanol (phenylethyl alcohol) | benzenoid / alcohol                   | 6054       | Y     | Fungi          | <i>F. oxysporum</i>                           | 1000 µg/mL = ± 50%                                                                                                                                                               | Medina-Romero et al., 2017    |
| 2-phenethylethanol                       | benzenoid / alcohol                   | 6054       | Y     | Not identified | <i>Aspergillus flavus</i>                     | 1000 µL/L = ±55%<br>There are also results with conidial germination ( <i>in vitro</i> ), sporulation ( <i>in vitro</i> and <i>in vivo</i> ), and spoilage control by fumigation | Boukaew and Prasertsan, 2018  |
| 2-phenethylethanol                       | benzenoid / alcohol                   | 6054       | Y     | Not identified | <i>Aspergillus parasiticus</i>                | 1000 µL/L = ±30%<br>There are also results with conidial germination ( <i>in vitro</i> ), sporulation ( <i>in vitro</i> and <i>in vivo</i> ), and spoilage control by fumigation | Boukaew and Prasertsan, 2018  |

| Compounds          | Chemical classes    | PubChem ID | mVOC* | Identified in | phytopathogen inhibited                       | Inhibitory concentrations                                              | References                |
|--------------------|---------------------|------------|-------|---------------|-----------------------------------------------|------------------------------------------------------------------------|---------------------------|
| 2-phenethylethanol | benzenoid / alcohol | 6054       | Y     | Fungi         | <i>Bo. cinerea</i>                            | EC50 = 0.57 $\mu$ L/mL                                                 | Di Francesco et al., 2015 |
| 2-phenethylethanol | benzenoid / alcohol | 6054       | Y     | Fungi         | <i>Bo. cinerea</i>                            | 625 $\mu$ L/L = 100%                                                   | Guo et al., 2019          |
| 2-phenethylethanol | benzenoid / alcohol | 6054       | Y     | Fungi         | <i>Co. acutatum</i>                           | EC50 = 1.97 $\mu$ L/mL                                                 | Di Francesco et al., 2015 |
| 2-phenethylethanol | benzenoid / alcohol | 6054       | Y     | Fungi         | <i>Co. gloeosporioides</i>                    | EC50 = 1.99 $\mu$ L/mL                                                 | Zhou et al., 2018         |
| 2-phenethylethanol | benzenoid / alcohol | 6054       | Y     | Fungi         | <i>Mo. fructicola</i>                         | 0.56 $\mu$ L/mL = 100%                                                 | Di Francesco et al., 2020 |
| 2-phenethylethanol | benzenoid / alcohol | 6054       | Y     | Fungi         | <i>Mo. laxa</i>                               | 0.56 $\mu$ L/mL = 100%                                                 | Di Francesco et al., 2020 |
| 2-phenethylethanol | benzenoid / alcohol | 6054       | Y     | Fungi         | <i>Mo. fructigena</i>                         | 0.56 $\mu$ L/mL = 100%                                                 | Di Francesco et al., 2020 |
| 2-phenethylethanol | benzenoid / alcohol | 6054       | Y     | Fungi         | <i>Mo. polystroma</i>                         | 0.56 $\mu$ L/mL = 100%                                                 | Di Francesco et al., 2020 |
| 2-phenethylethanol | benzenoid / alcohol | 6054       | Y     | Bacteria      | <i>Per. litchii</i>                           | 1000 $\mu$ L/L (volume N.M.) = mycelia reduced in 12.9 mm ( $\pm$ 25%) | Xing et al., 2018         |
| 2-phenethylethanol | benzenoid / alcohol | 6054       | Y     | Fungi         | <i>Pen. digitatum</i>                         | EC50 = 0.61 $\mu$ L/mL                                                 | Di Francesco et al., 2015 |
| 2-phenethylethanol | benzenoid / alcohol | 6054       | Y     | Fungi         | <i>Pen. expansum</i>                          | EC50 = 0.79 $\mu$ L/mL                                                 | Di Francesco et al., 2015 |
| 2-phenethylethanol | benzenoid / alcohol | 6054       | Y     | Fungi         | <i>Pen. italicum</i>                          | EC50 = 0.62 $\mu$ L/mL                                                 | Di Francesco et al., 2015 |
| 2-phenethylethanol | alcohol / benzenoid | 6054       | Y     | Fungi         | <i>Phyl. citricarpa</i>                       | 50 $\mu$ L (concentration N.M.) = 35%                                  | Toffano et al., 2017      |
| 2-phenethylethanol | benzenoid / alcohol | 6054       | Y     | Fungi         | <i>Phyt. crispans</i>                         | EC50 = 3.67 $\mu$ L/L                                                  | Di Francesco et al., 2017 |
| 2-phenethylethanol | benzenoid / alcohol | 6054       | Y     | Bacteria      | <i>T. ethacetica</i>                          | 50 mM = 100%                                                           | Freitas et al., 2022      |
| 2R, 3R-butanediol  | alcohol             | 262        | Y     | Bacteria      | <i>E. carotovora</i> subsp. <i>carotovora</i> | 100 $\mu$ g = 11% (D.I.)                                               | Han et al., 2006          |
| 2-tridecanol       | alcohol             | 15449      | Y     | Bacteria      | <i>Ra. solanacearum</i>                       | 40 $\mu$ g/100 $\mu$ L (methanol) = $\pm$ 50%                          | Raza et al., 2016a        |

| Compounds          | Chemical classes | PubChem ID | mVOC* | Identified in | phytopathogen inhibited                  | Inhibitory concentrations                          | References                 |
|--------------------|------------------|------------|-------|---------------|------------------------------------------|----------------------------------------------------|----------------------------|
| 2-tridecanone      | ketone           | 11622      | Y     | Bacteria      | <i>F. oxysporum</i> f. sp. <i>niveum</i> | 200 µL (concentration N.M.) = 70%                  | Raza et al., 2015          |
| 2-tridecanone      | ketone           | 11622      | Y     | Bacteria      | <i>T. ethacetica</i>                     | 0.5 mM = 100 %                                     | Freitas et al., 2022       |
| 2-undecanol        | alcohol          |            | Y     | Bacteria      | <i>T. ethacetica</i>                     | 0.5 mM = 100%                                      | Freitas et al., 2022       |
| 2-undecanone       | ketone           | 8163       | Y     | Bacteria      | <i>Ag. tumefaciens</i>                   | 100 µmol = 80%                                     | Plyuta et al., 2016        |
| 2-undecanone       | ketone           | 8163       | Y     | Bacteria      | <i>Burs. xylophilus</i>                  | 0.05 mmol = 100%                                   | Gu et al., 2007            |
| 2-undecanone       | ketone           | 8163       | Y     | Bacteria      | <i>Meloidogyne</i> sp.                   | 100 nmol = 95%                                     | Wolfgang et al., 2019      |
| 2-undecanone       | ketone           | 8163       | Y     | Bacteria      | <i>Per. litchii</i>                      | EC50 = 764.3 mg/L                                  | Zheng et al., 2019a        |
| 2-undecanone       | ketone           | 8163       | Y     | Bacteria      | <i>S. sclerotiorum</i>                   | mycelium MIQ = 14.85 mg<br>sclerotia MIQ = 16.5 mg | Giorgio et al., 2015       |
| 2-undecanone       | ketone           | 8163       | Y     | Bacteria      | <i>Synechococcus</i> sp.                 | 100 µmol = 100%                                    | Popova et al., 2014        |
| 3-methyl-1-butanol | alcohol          | 31260      | Y     | Fungi         | <i>Bo. cinerea</i>                       | EC50 = 0.78 µL/mL                                  | Di Francesco et al., 2015  |
| 3-methyl-1-butanol | alcohol          | 31260      | Y     | Fungi         | <i>Bo. cinerea</i>                       | 1250 µL/L = 100%                                   | Guo et al., 2019           |
| 3-methyl-1-butanol | alcohol          | 31260      | Y     | Fungi         | <i>Co. acutatum</i>                      | EC50 = 1.35 µL/mL                                  | Di Francesco et al., 2015  |
| 3-methyl-1-butanol | alcohol          | 31260      | Y     | Fungi         | <i>F. oxysporum</i>                      | 1000 µg/mL = ± 20%                                 | Medina-Romero et al., 2017 |
| 3-methyl-1-butanol | alcohol          | 31260      | Y     | Fungi         | <i>M.o fructicola</i>                    | EC50 = 0.015 µL/mL                                 | Di Francesco et al., 2020  |
| 3-methyl-1-butanol | alcohol          | 31260      | Y     | Fungi         | <i>Mo. fructigena</i>                    | EC50 = 0.013 µL/mL                                 | Di Francesco et al., 2020  |
| 3-methyl-1-butanol | alcohol          | 31260      | Y     | Fungi         | <i>Mo. laxa</i>                          | EC50 = 0.012 µL/mL                                 | Di Francesco et al., 2020  |
| 3-methyl-1-butanol | alcohol          | 31260      | Y     | Fungi         | <i>Mo. polystroma</i>                    | EC50 = 0.010 µL/mL                                 | Di Francesco et al., 2020  |

| Compounds                        | Chemical classes           | PubChem ID | mVOC* | Identified in | phytopathogen inhibited                       | Inhibitory concentrations                    | References                  |
|----------------------------------|----------------------------|------------|-------|---------------|-----------------------------------------------|----------------------------------------------|-----------------------------|
| 3-methyl-1-butanol               | alcohol                    | 31260      | Y     | Fungi         | <i>Phyt. crispans</i>                         | EC50 = 3.62 µL/L                             | Di Francesco et al., 2017   |
| 3-methyl-1-butanol               | alcohol                    | 31260      | Y     | Fungi         | <i>Pen. digitatum</i>                         | EC50 = 0.73 µL/mL                            | Di Francesco et al., 2015   |
| 3-methyl-1-butanol               | alcohol                    | 31260      | Y     | Fungi         | <i>Pen. expansum</i>                          | EC50 = 1.01 µL/mL                            | Di Francesco et al., 2015   |
| 3-methyl-1-butanol               | alcohol                    | 31260      | Y     | Fungi         | <i>Pen. italicum</i>                          | EC50 = 1.13 µL/mL                            | Di Francesco et al., 2015   |
| 3-methyl-1-butanol               | alcohol                    | 31260      | Y     | Bacteria      | <i>Phyt. capsici</i>                          | 10 µg/mL (volume N.M.) = ± 65% inhibition    | Syed-Ab-Rahman et al., 2019 |
| 3-methylbutanal                  | aldehyde                   | 11552      | Y     | Bacteria      | <i>Co. gloeosporioides</i>                    | EC50 = 7.67 x 10 <sup>-3</sup> mol/L         | Gao et al., 2018            |
| 3-methylbutanal                  | aldehyde                   | 11552      | Y     | Bacteria      | <i>Phyt. capsici</i>                          | 10 µg/mL (volume N.M.) = 100% inhibition     | Syed-Ab-Rahman et al., 2019 |
| 3-phenyl-1-propanol              | alcohol / benzenoid        | 31234      | Y     | Fungi         | <i>Bo. cinerea</i>                            | 1250 µL/L = 75%                              | Guo et al., 2019            |
| 4-chloro-3-methyl phenol         | phenol                     | 1732       | N     | Bacteria      | <i>Al. solani</i>                             | 80 µL (standard) = 100%                      | Gao et al., 2017            |
| 4-chloro-3-methyl phenol         | phenol                     | 1732       | N     | Bacteria      | <i>Bo. cinerea</i>                            | 80 µL (standard) = 100%                      | Gao et al., 2017            |
| 4-ethylphenol                    | phenol                     | 31242      | N     | Fungi         | <i>Bo. cinerea</i>                            | 100 mg/L = 89%                               | Guo et al., 2019            |
| 4-ethylphenol                    | phenol                     | 31242      | N     | Bacteria      | <i>Per. litchii</i>                           | 1000 µL/L (volume N.M.) = 100%               | Xing et al., 2018           |
| 4-methoxystyrene                 | benzenoid / alkene / ether | 12507      | Y     | Bacteria      | <i>F. oxysporum</i> f. sp. <i>cucumerinum</i> | 80 µL (standard) = 46%                       | Wu et al., 2015             |
| 4-methoxystyrene                 | benzenoid / alkene / ether | 12507      | Y     | Bacteria      | <i>S. sclerotiorum</i>                        | 80 µL (standard) = 91%                       | Wu et al., 2015             |
| 5-isobutyl-2,3-dimethyl pyrazine | pyrazine                   | 528108     | N     | Bacteria      | <i>Meloidogyne</i> sp.                        | 20 µL (standard) = 44%                       | Wolfgang et al., 2019       |
| 5-(4-pentenyl)-2-furaldehyde     | furan / aldehyde           | 86008063   | **    | Bacteria      | <i>Colletotrichum fragariae</i>               | N.I. (1:10 dilution of pure compound) = 100% | Koita bashi et al., 2004    |
| 5-pentyl-2-furaldehyde           | furan / aldehyde           | 68532-62-7 | **    | Bacteria      | <i>Bo. cinerea</i>                            | 8 µg/mL = 100%                               | Koita bashi et al., 2004    |

| Compounds              | Chemical classes          | PubChem ID | mVOC* | Identified in  | phytopathogen inhibited   | Inhibitory concentrations                                                                                                                                                                | References                   |
|------------------------|---------------------------|------------|-------|----------------|---------------------------|------------------------------------------------------------------------------------------------------------------------------------------------------------------------------------------|------------------------------|
| 5-pentyl-2-furaldehyde | furan / aldehyde          | 68532-62-7 | **    | Bacteria       | <i>Co. fragariae</i>      | 8 µg/mL = 100%                                                                                                                                                                           | Koitabashi et al., 2004      |
| 5-pentyl-2-furaldehyde | furan / aldehyde          | 68532-62-7 | **    | Bacteria       | <i>F. oxysporum</i>       | 2 µg/mL = 100%                                                                                                                                                                           | Koitabashi et al., 2004      |
| acetamide              | amide / nitrogen compound | 178        | Y     | Bacteria       | <i>Pa. lilacinus</i>      | spore: 2 mg/L ≥ 99%<br>mycelium: 53 mg/L ≥ 99%                                                                                                                                           | Zou et al., 2007             |
| acetamide              | amide / nitrogen compound | 178        | Y     | Bacteria       | <i>Po. chlamydosporia</i> | spore: 4 mg/L ≥ 99%<br>mycelium: 67 mg/L ≥ 99%                                                                                                                                           | Zou et al., 2007             |
| acetic acid            | acid / carboxylic acid    | 176        | Y     | Bacteria       | <i>S.. sclerotiorum</i>   | mycelium MIQ = 4.19 mg<br>sclerotia MIQ = 9.44 mg                                                                                                                                        | Giorgio et al., 2015         |
| acetoin                | ketone / alcohol          | 179        | Y     | Bacteria       | <i>Bo. cinerea</i>        | 1.35 µL/mL = 47%                                                                                                                                                                         | Gotor-Vila et al., 2017      |
| acetoin                | ketone / alcohol          | 179        | Y     | Bacteria       | <i>Co. lindemuthianum</i> | 10 µL (88.8 g/mol) = partial inhibition (% N.M.)                                                                                                                                         | Martins et al., 2019         |
| acetoin                | ketone / alcohol          | 179        | Y     | Bacteria       | <i>Mo. laxa</i>           | 1.35 µL/mL = 23%                                                                                                                                                                         | Gotor-Vila et al., 2017      |
| acetophenone           | benzenoid / ketone        | 7410       | Y     | Not identified | <i>As. flavus</i>         | 100 and 1000 µL/L = 100%<br>There are also results with conidial germination ( <i>in vitro</i> ), sporulation ( <i>in vitro</i> and <i>in vivo</i> ), and spoilage control by fumigation | Boukaew and Prasertsan, 2018 |
| acetophenone           | ketone                    | 7410       | Y     | Bacteria       | <i>Burs. xylophilus</i>   | 2.0 mmol = 100%                                                                                                                                                                          | Gu et al., 2007              |
| acetophenone           | benzenoid / ketone        | 7410       | Y     | Not identified | <i>As. parasiticus</i>    | 100 and 1000 µL/L = 100%<br>There are also results with conidial germination ( <i>in vitro</i> ), sporulation ( <i>in vitro</i> and                                                      | Boukaew and Prasertsan, 2018 |

| Compounds    | Chemical classes     | PubChem ID | mVOC* | Identified in | phytopathogen inhibited                                    | Inhibitory concentrations                                                               | References         |
|--------------|----------------------|------------|-------|---------------|------------------------------------------------------------|-----------------------------------------------------------------------------------------|--------------------|
|              |                      |            |       |               |                                                            | <i>in vivo</i> ), and spoilage control by fumigation                                    |                    |
| acetophenone | benzenoid / ketone   | 7410       | Y     | Bacteria      | <i>F. oxysporum</i> f. sp. <i>niveum</i>                   | 200 µL (concentration N.M.) = 100%                                                      | Raza et al., 2015  |
| a-copaene    | terpene              | 70678558   | Y     | Bacteria      | <i>Per. litchii</i>                                        | 500 µL/L (volume N.M.) = 100%                                                           | Xing et al., 2018  |
| ammonia      | nitrogen compound    | 222        | N     | Bacteria      | <i>Pythium aphanidermatum</i>                              | 10uL (25 g/mL) = 100%                                                                   | Huang et al., 2018 |
| ammonia      | nitrogen compound    | 222        | N     | Bacteria      | <i>Py. ultimum</i>                                         | 8 µL (concentration N.M.) = 100%                                                        | Howell, 1988       |
| ammonia      | nitrogen compound    | 222        | N     | Bacteria      | <i>Rh. solani</i>                                          | 10uL (25 g/mL) = 100%                                                                   | Huang et al., 2018 |
| ammonia      | nitrogen compound    | 222        | N     | Bacteria      | <i>Rh. solani</i>                                          | 8 µL (concentration N.M.) = 100%                                                        | Howell, 1988       |
| anisole      | benzenoid / ether    | 7519       | Y     | Bacteria      | <i>Co. gloeosporioides</i>                                 | EC50 = 0.59 mol/L                                                                       | Gao et al., 2018   |
| anisole      | benzenoid / ether    | 7519       | Y     | Bacteria      | <i>F. oxysporum</i> f. sp. <i>cucumerinum</i>              | 80 µL (standard) = 38%                                                                  | Wu et al., 2015    |
| anisole      | benzenoid / ether    | 7519       | Y     | Bacteria      | <i>S. sclerotiorum</i>                                     | 80 µL (standard) = 76%                                                                  | Wu et al., 2015    |
| benzaldehyde | benzenoid / aldehyde | 240        | Y     | Bacteria      | <i>Burs. xylophilus</i>                                    | 0.39 mmol = 100%                                                                        | Gu et al., 2007    |
| benzaldehyde | benzenoid / aldehyde | 240        | Y     | Bacteria      | <i>Clavibacter michiganensis</i> subsp. <i>sepedonicus</i> | 100 µl (10 and 100 µL/mL and undiluted) = cell viability reduced in up to ±7 log CFU/mL | Rajer et al., 2017 |
| benzaldehyde | benzenoid / aldehyde | 240        | Y     | Bacteria      | <i>Co. acutatum</i>                                        | 40 µL (standard) = 100%                                                                 | Che et al., 2017   |
| benzaldehyde | benzenoid / aldehyde | 240        | Y     | Bacteria      | <i>F. oxysporum</i> sp. <i>niveum</i>                      | 200 µL (concentration N.M.) = 100%                                                      | Raza et al., 2015  |
| benzaldehyde | benzenoid / aldehyde | 240        | Y     | Bacteria      | <i>Mo. fructicola</i>                                      | EC50 = 6.7 x 10 <sup>-4</sup> mol/L                                                     | Gao et al., 2018   |
| benzaldehyde | benzenoid / aldehyde | 240        | Y     | Bacteria      | <i>Po. chlamydosporia</i>                                  | spore: 6 mg/L ≥ 99% mycelium: 40 mg/L ≥ 99%                                             | Zou et al., 2007   |

| Compounds      | Chemical classes                                           | PubChem ID | mVOC* | Identified in | phytopathogen inhibited                            | Inhibitory concentrations                                                                              | References           |
|----------------|------------------------------------------------------------|------------|-------|---------------|----------------------------------------------------|--------------------------------------------------------------------------------------------------------|----------------------|
| benzaldehyde   | benzenoid / aldehyde                                       | 240        | Y     | Bacteria      | <i>Pa. lilacinus</i>                               | spore: 4 mg/L $\geq$ 99%<br>mycelium: 16 mg/L $\geq$ 99%                                               | Zou et al., 2007     |
| benzaldehyde   | benzenoid / aldehyde                                       | 240        | Y     | Bacteria      | <i>Ra. solanacearum</i>                            | 5.2 mg = $\pm$ 60%                                                                                     | Tahir et al., 2017a  |
| benzaldehyde   | benzenoid / aldehyde                                       | 240        | Y     | Bacteria      | <i>Ra. solanacearum</i>                            | 40 $\mu$ g/100 $\mu$ L (methanol) = $\pm$ 50%                                                          | Raza et al., 2016a   |
| benzaldehyde   | benzenoid / aldehyde                                       | 240        | Y     | Bacteria      | <i>T. ethacetica</i>                               | 5 mM = 100%                                                                                            | Freitas et al., 2022 |
| benzeneethanol | alcohol                                                    | 21965192   | N     | Bacteria      | <i>Burs. xylophilus</i>                            | 2.0 mmol = 85%                                                                                         | Gu et al., 2007      |
| benzoic acid   | carboxylic acid / benzenoid                                | 243        | Y     | Bacteria      | <i>Mo. fructicola</i>                              | EC50 = 1.46 x 10 <sup>-3</sup> mol/L                                                                   | Gao et al., 2018     |
| benzothiazole  | benzenoid / thiazole / sulfur compound / nitrogen compound | 7222       | Y     | Bacteria      | <i>Al. solani</i>                                  | 80 $\mu$ L (standard) = 100%                                                                           | Gao et al., 2017     |
| benzothiazole  | benzenoid / thiazole / sulfur compound / nitrogen compound | 7222       | Y     | Bacteria      | <i>Al. brassicae</i>                               | 7.5 mg = mycelia reduced in 62.6 mm ( $\pm$ 90%)                                                       | Zhao et al., 2011    |
| benzothiazole  | benzenoid / thiazole / sulfur compound / nitrogen compound | 7222       | Y     | Bacteria      | <i>Bo. cinerea</i>                                 | 80 $\mu$ L (standard) = 100%                                                                           | Gao et al., 2017     |
| benzothiazole  | benzenoid / thiazole / sulfur compound / nitrogen compound | 7222       | Y     | Bacteria      | <i>Bo. cinerea</i>                                 | 5.0 mg = mycelia reduced in 64.4 mm ( $\pm$ 90%)                                                       | Zhao et al., 2011    |
| benzothiazole  | benzenoid / thiazole / sulfur compound / nitrogen compound | 7222       | Y     | Bacteria      | <i>Co. gloeosporioides</i>                         | EC50 = 0.36 mol/L                                                                                      | Gao et al., 2018     |
| benzothiazole  | benzenoid / thiazole / sulfur compound / nitrogen compound | 7222       | Y     | Bacteria      | <i>Cl. michiganensis</i> subsp. <i>sepedonicus</i> | 100 $\mu$ l (10 and 100 $\mu$ L/mL and undiluted) = cell viability reduced in up to $\pm$ 3 log CFU/mL | Rajer et al., 2017   |
| benzothiazole  | benzenoid / thiazole / sulfur compound / nitrogen compound | 7222       | Y     | Bacteria      | <i>Co. capsici</i>                                 | 7.5 mg = mycelia reduced in 58.7 mm ( $\pm$ 89%)                                                       | Zhao et al., 2011    |
| benzothiazole  | benzenoid / thiazole / sulfur compound / nitrogen compound | 7222       | Y     | Bacteria      | <i>F. oxysporum</i>                                | 7.5 mg = mycelia reduced in 39.7 mm ( $\pm$ 60%)                                                       | Zhao et al., 2011    |



| Compounds      | Chemical classes                                           | PubChem ID | mVOC* | Identified in | phytopathogen inhibited                  | Inhibitory concentrations                  | References            |
|----------------|------------------------------------------------------------|------------|-------|---------------|------------------------------------------|--------------------------------------------|-----------------------|
| benzothiazole  | benzenoid / thiazole / sulfur compound / nitrogen compound | 7222       | Y     | Bacteria      | <i>F. oxysporum</i> f. sp. <i>niveum</i> | 200 µL (concentration N.M.) = 100%         | Raza et al., 2015     |
| benzothiazole  | benzenoid / thiazole / sulfur compound / nitrogen compound | 7222       | Y     | Bacteria      | <i>Mo. fruticola</i>                     | 1 mol/L = 65%                              | (Zhou et al., 2019)   |
| benzothiazole  | benzenoid / thiazole / sulfur compound / nitrogen compound | 7222       | Y     | Bacteria      | <i>Mo. fruticola</i>                     | EC50 = 2.29 x 10 <sup>-2</sup> mol/L       | Gao et al., 2018      |
| benzothiazole  | benzenoid / thiazole / sulfur compound / nitrogen compound | 7222       | Y     | Bacteria      | <i>Po. chlamydosporia</i>                | mycelium: (≥ 99%) = 158 mg/L               | Zou et al., 2007      |
| benzothiazole  | benzenoid / thiazole / sulfur compound / nitrogen compound | 7222       | Y     | Bacteria      | <i>Pa. lilacinus</i>                     | mycelium: (≥ 99%) = 29 mg/L                | Zou et al., 2007      |
| benzothiazole  | benzenoid / thiazole / sulfur compound / nitrogen compound | 7222       | Y     | Bacteria      | <i>Per. litchii</i>                      | EC50 = 146.4 mg/L                          | Zheng et al., 2019a   |
| benzothiazole  | benzenoid / thiazole / sulfur compound / nitrogen compound | 7222       | Y     | Bacteria      | <i>Pes. photiniae</i>                    | 7.5 mg = mycelia reduced in 57.7 mm (±82%) | Zhao et al., 2011     |
| benzothiazole  | benzenoid / thiazole / sulfur compound / nitrogen compound | 7222       | Y     | Bacteria      | <i>Phyt. capsici</i>                     | 7.5 mg = mycelia reduced in 60.2 mm (±90%) | Zhao et al., 2011     |
| benzothiazole  | benzenoid / thiazole / sulfur compound / nitrogen compound | 7222       | Y     | Bacteria      | <i>Ph. melonis</i>                       | 7.5 mg = mycelia reduced in 59 mm (±89%)   | Zhao et al., 2011     |
| benzothiazole  | benzenoid / thiazole / sulfur compound / nitrogen compound | 7222       | Y     | Bacteria      | <i>Ra. solanacearum</i>                  | 40 µg/100µL (methanol) = ±50%              | Raza et al., 2016a    |
| benzothiazole  | benzenoid / thiazole / sulfur compound / nitrogen compound | 7222       | Y     | Bacteria      | <i>Rh. solani</i>                        | 7.5 mg = mycelia reduced in 68.4 mm (±91%) | Zhao et al., 2011     |
| benzothiazole  | benzenoid / thiazole / sulfur compound / nitrogen compound | 7222       | Y     | Bacteria      | <i>S. sclerotiorum</i>                   | 100 and 150 µL (concentration N.M.) = 100% | Fernando et al., 2005 |
| benzyl alcohol | benzenoid / alcohol                                        | 244        | Y     | Fungi         | <i>Bo. cinerea</i>                       | 625 µL/L = 100%                            | Guo et al., 2019      |

| Compounds                           | Chemical classes             | PubChem ID | mVOC* | Identified in | phytopathogen inhibited                  | Inhibitory concentrations                                     | References             |
|-------------------------------------|------------------------------|------------|-------|---------------|------------------------------------------|---------------------------------------------------------------|------------------------|
| benzyl alcohol                      | benzenoid / alcohol          | 244        | Y     | Bacteria      | <i>F. oxysporum</i> f. sp. <i>niveum</i> | 200 µL (concentration N.M.) = 70%                             | Raza et al., 2015      |
| benzyl alcohol                      | benzenoid / alcohol          | 244        | Y     | Bacteria      | <i>T. ethacetica</i>                     | 50 mM = 100%                                                  | Freitas et al., 2022   |
| caryophyllene                       | terpene                      | 5281515    | Y     | Bacteria      | <i>Per. litchii</i>                      | 1000 µL/L (volume N.M.) = mycelia reduced in 32.6 mm (±64%)   | Xing et al., 2018      |
| chloroacetic acid, tetradecyl ester | ester / halogenated compound | 519540     | N     | Bacteria      | <i>Co. gloeosporioides</i>               | 200 µL (200 µL/mL liquid or 100 mg/mL solid compounds) = 100% | Rajaofera et al., 2019 |
| citronellol                         | terpene / alcohol            | 8842       | Y     | Bacteria      | <i>Al. brassicae</i>                     | 7.5 mg = mycelia reduced in 26.3 mm (±38%)                    | Zhao et al., 2011      |
| citronellol                         | terpene / alcohol            | 8842       | Y     | Bacteria      | <i>Bo. cinerea</i>                       | 7.5 mg = mycelia reduced in 24.4 mm (±34%)                    | Zhao et al., 2011      |
| citronellol                         | terpene / alcohol            | 8842       | Y     | Bacteria      | <i>Co. capsici</i>                       | 7.5 mg = mycelia reduced in 44.3 mm (±67%)                    | Zhao et al., 2011      |
| citronellol                         | terpene / alcohol            | 8842       | Y     | Bacteria      | <i>F. oxysporum</i>                      | 7.5 mg = mycelia reduced in 53.5 mm (±80%)                    | Zhao et al., 2011      |
| citronellol                         | terpene / alcohol            | 8842       | Y     | Bacteria      | <i>Phyt. capsici</i>                     | 7.5 mg = mycelia reduced in 46.7 mm (±69%)                    | Zhao et al., 2011      |
| citronellol                         | terpene / alcohol            | 8842       | Y     | Bacteria      | <i>Ph. melonis</i>                       | 7.5 mg = mycelia reduced in 51.7 mm (±78%)                    | Zhao et al., 2011      |
| citronellol                         | terpene / alcohol            | 8842       | Y     | Bacteria      | <i>Pes. photiniae</i>                    | 7.5 mg = mycelia reduced in 31.6 mm (±45%)                    | Zhao et al., 2011      |
| citronellol                         | terpene / alcohol            | 8842       | Y     | Bacteria      | <i>Rh. solani</i>                        | 7.5 mg = mycelia reduced in 45.7 mm (±61%)                    | Zhao et al., 2011      |

| Compounds          | Chemical classes                      | PubChem ID | mVOC* | Identified in | phytopathogen inhibited                  | Inhibitory concentrations                                                      | References                     |
|--------------------|---------------------------------------|------------|-------|---------------|------------------------------------------|--------------------------------------------------------------------------------|--------------------------------|
| cyclohexanol       | alcohol                               | 7966       | Y     | Bacteria      | <i>S. sclerotiorum</i>                   | 100 and 150 $\mu$ L (concentration N.M.) = 100%                                | Fernando et al., 2005          |
| cyclohexene        | alkene                                | 8079       | N     | Bacteria      | <i>Burs. xylophilus</i>                  | 0.99 mmol = 100%                                                               | Gu et al., 2007                |
| decanal            | aldehyde                              | 8175       | Y     | Bacteria      | <i>Burs. xylophilus</i>                  | 0.20 mmol = 100%                                                               | Gu et al., 2007                |
| decanal            | aldehyde                              | 8175       | Y     | Bacteria      | <i>F. oxysporum</i> f. sp. <i>niveum</i> | 200 $\mu$ L (concentration N.M.) = 100%                                        | Raza et al., 2015              |
| decanal            | aldehyde                              | 8175       | Y     | Bacteria      | <i>S. sclerotiorum</i>                   | 100 and 150 $\mu$ L (concentration N.M.) = 100%                                | Fernando et al., 2005          |
| decanoic acid      | carboxylic acid                       | 2969       | Y     | Fungi         | <i>Bo. cinerea</i>                       | 100 mg/L = 23%                                                                 | Guo et al., 2019               |
| dimethyl disulfide | sulfide / thioether / sulfur compound | 12232      | Y     | Bacteria      | <i>Ag. tumefasciens</i>                  | Effective doses of 20 $\mu$ L at 50, 100 and 200 $\mu$ mol (inhibition % N.M.) | Dandurishvili et al., 2011     |
| dimethyl disulfide | sulfide / thioether / sulfur compound | 12232      | Y     | Bacteria      | <i>Ag. tumefasciens</i>                  | 20 mg = inhibition % N.M.                                                      | Chernin et al., 2013           |
| dimethyl disulfide | sulfide / thioether / sulfur compound | 12232      | Y     | Bacteria      | <i>Ag. tumefasciens</i>                  | 150 $\mu$ mol = ~100% biofilm formation inhibited                              | Plyuta et al., 2016            |
| dimethyl disulfide | sulfide / thioether / sulfur compound | 12232      | Y     | Bacteria      | <i>Agrobacterium vitis</i>               | Effective doses of 20 $\mu$ L at 50, 100 and 200 $\mu$ mol (inhibition % N.M.) | Dandurishvili et al., 2011     |
| dimethyl disulfide | sulfide / thioether / sulfur compound | 12232      | Y     | Bacteria      | <i>Bo. cinerea</i>                       | 1000 $\mu$ M (volume N.M.) = mycelia reduced in $\pm$ 13 mm ( $\pm$ 37%)       | Rojas-Solís et al., 2018       |
| dimethyl disulfide | sulfide / thioether / sulfur compound | 12232      | Y     | Bacteria      | <i>Burs. xylophilus</i>                  | 0.44 mmol = 100%                                                               | Gu et al., 2007                |
| dimethyl disulfide | sulfide / thioether / sulfur compound | 12232      | Y     | Bacteria      | <i>F. solani</i>                         | 200 $\mu$ L (standard) = 100%                                                  | Guevara-Avenidaño et al., 2019 |

| Compounds           | Chemical classes                      | PubChem ID | mVOC* | Identified in | phytopathogen inhibited    | Inhibitory concentrations                                                              | References                     |
|---------------------|---------------------------------------|------------|-------|---------------|----------------------------|----------------------------------------------------------------------------------------|--------------------------------|
| dimethyl disulfide  | sulfide / thioether / sulfur compound | 12232      | Y     | Bacteria      | <i>Py. aphanidermatum</i>  | 1.5 $\mu$ L (98 g/mL) = 100%                                                           | Huang et al., 2018             |
| dimethyl disulfide  | sulfide / thioether / sulfur compound | 12232      | Y     | Bacteria      | <i>Py. ultimum</i>         | 1 $\mu$ l ( $\pm$ 11.1 $\mu$ M) = 30.0mm treated / control 45.0 mm                     | Ossowicki et al., 2017         |
| dimethyl disulfide  | sulfide / thioether / sulfur compound | 12232      | Y     | Bacteria      | <i>Ra. solanacearum</i>    | 40 $\mu$ g/100 $\mu$ L (methanol) = $\pm$ 50%                                          | Raza et al., 2016a             |
| dimethyl disulfide  | sulfide / thioether / sulfur compound | 12232      | Y     | Bacteria      | <i>Rh. solani</i>          | 8 $\mu$ L (98 g/mL) = 100%                                                             | Huang et al., 2018             |
| dimethyl disulfide  | sulfide / thioether / sulfur compound | 12232      | Y     | Bacteria      | <i>Rh. solani</i>          | 1 $\mu$ l ( $\pm$ 11.1 $\mu$ M) = 41.0mm treated / control 45.0 mm                     | Ossowicki et al., 2017         |
| dimethyl disulfide  | sulfide / thioether / sulfur compound | 12232      | Y     | Bacteria      | <i>S. sclerotiorum</i>     | 100 and 150 $\mu$ L (concentration N.M.) = 100%                                        | Fernando et al., 2005          |
| dimethyl disulfide  | sulfide / thioether / sulfur compound | 12232      | Y     | Bacteria      | <i>S. sclerotiorum</i>     | mycelium MIQ = 31.38 mg<br>sclerotia MIQ = 73.22 mg                                    | Giorgio et al., 2015           |
| dimethyl disulfide  | sulfide / thioether / sulfur compound | 12232      | Y     | Bacteria      | <i>Synechococcus</i> sp.   | 100 $\mu$ mol = 100%                                                                   | Popova et al., 2014            |
| dimethyl disulfide  | sulfide / thioether / sulfur compound | 12232      | Y     | Bacteria      | <i>T. ethacetica</i>       | 5 mM = 100%                                                                            | Freitas et al., 2022           |
| dimethyl trisulfide | sulfide / thioether/ sulfur compound  | 19310      | Y     | Bacteria      | <i>At. rolfsii</i>         | Complete inhibition at all tested concentrations<br>MIC = 2.65 $\mu$ g/cm <sup>3</sup> | Agisha et al., 2019            |
| dimethyl trisulfide | sulfide / thioether/ sulfur compound  | 19310      | Y     | Bacteria      | <i>Co. gloeosporioides</i> | Complete inhibition at all tested concentrations<br>MIC = 2.65 $\mu$ g/cm <sup>3</sup> | Agisha et al., 2019            |
| dimethyl trisulfide | sulfide / thioether/ sulfur compound  | 19310      | Y     | Bacteria      | <i>F. solani</i>           | 200 $\mu$ L (standard) = 100%                                                          | Guevara-Avenidaño et al., 2019 |
| dimethyl trisulfide | sulfide / thioether/ sulfur compound  | 19310      | Y     | Bacteria      | <i>G. moliniformis</i>     | Complete inhibition at all tested concentrations<br>MIC = 2.65 $\mu$ g/cm <sup>3</sup> | Agisha et al., 2019            |
| dimethyl trisulfide | sulfide / thioether/ sulfur compound  | 19310      | Y     | Bacteria      | <i>Ma. oryzae</i>          | Complete inhibition at all tested concentrations<br>MIC = 2.65 $\mu$ g/cm <sup>3</sup> | Agisha et al., 2019            |

| Compounds               | Chemical classes                     | PubChem ID | mVOC* | Identified in | phytopathogen inhibited                  | Inhibitory concentrations                                                         | References             |
|-------------------------|--------------------------------------|------------|-------|---------------|------------------------------------------|-----------------------------------------------------------------------------------|------------------------|
| dimethyl trisulfide     | sulfide / thioether/ sulfur compound | 19310      | Y     | Bacteria      | <i>Phyt. capsici</i>                     | Complete inhibition at all tested concentrations<br>MIC = 2.65 µg/cm <sup>3</sup> | Agisha et al., 2019    |
| dimethyl trisulfide     | sulfide / thioether/ sulfur compound | 19310      | Y     | Bacteria      | <i>Py. myriotilum</i>                    | Complete inhibition at all tested concentrations<br>MIC = 2.65 µg/cm <sup>3</sup> | Agisha et al., 2019    |
| dimethyl trisulfide     | sulfide / thioether/ sulfur compound | 19310      | Y     | Bacteria      | <i>Py. ultimum</i>                       | 1 µl (± 9.5 µM) = 100%                                                            | Ossowicki et al., 2017 |
| dimethyl trisulfide     | sulfide / thioether/ sulfur compound | 19310      | Y     | Bacteria      | <i>Ra. pseudosolanacearum</i>            | Complete inhibition at all tested concentrations<br>21 µg/cm <sup>3</sup> = 100%  | Agisha et al., 2019    |
| dimethyl trisulfide     | sulfide / thioether/ sulfur compound | 19310      | Y     | Bacteria      | <i>Rh. solani</i>                        | Complete inhibition at all tested concentrations<br>MIC = 2.65 µg/cm <sup>3</sup> | Agisha et al., 2019    |
| dimethyl trisulfide     | sulfide / thioether/ sulfur compound | 19310      | Y     | Bacteria      | <i>Rh. solani</i>                        | 1 µl (± 9.5 µM) = 100%                                                            | Ossowicki et al., 2017 |
| dimethyl trisulfide     | sulfide / thioether/ sulfur compound | 19310      | Y     | Bacteria      | <i>S. sclerotiorum</i>                   | mycelium MIQ = 24.04 mg<br>sclerotia MIQ = 24.04 mg                               | Giorgio et al., 2015   |
| dimethyl trisulfide     | sulfide / thioether/ sulfur compound | 19310      | Y     | Bacteria      | <i>T. ethacetica</i>                     | 0.5 mM = 100%                                                                     | Freitas et al., 2022   |
| dl-limonene             | Terpene / monoterpene                | 22311      | Y     | Bacteria      | <i>S. sclerotiorum</i>                   | mycelium MIQ = 17.2 mg<br>sclerotia MIQ = 30.1 mg                                 | Giorgio et al., 2015   |
| docosane                | alkane                               | 12405      | Y     | Bacteria      | <i>Co. gloeosporioides</i>               | 200 µL (200 µL/mL liquid or 100 mg/mL solid compounds) = 79%                      | Rajaofera et al., 2019 |
| dodecanal               | aldehyde                             | 8194       | Y     | Bacteria      | <i>F. oxysporum</i> f. sp. <i>niveum</i> | 200 µL (concentration N.M.) = 100%                                                | Raza et al., 2015      |
| dodecane                | alkane                               | 8182       | Y     | Bacteria      | <i>Burs. xylophilus</i>                  | 2.0 mmol = 42%                                                                    | Gu et al., 2007        |
| ethyl 3-hydroxybutyrate | ester / alcohol                      | 62572      | N     | Fungi         | <i>Bo. cinerea</i>                       | 1250 µL/L = 58%                                                                   | Guo et al., 2019       |
| ethyl acetate           | ester                                | 8857       | Y     | Fungi         | <i>Bo. cinerea</i>                       | 1250 µL/L = 100%                                                                  | Guo et al., 2019       |

| Compounds                                 | Chemical classes         | PubChem ID | mVOC* | Identified in | phytopathogen inhibited                  | Inhibitory concentrations                                    | References             |
|-------------------------------------------|--------------------------|------------|-------|---------------|------------------------------------------|--------------------------------------------------------------|------------------------|
| ethyl acetate                             | ester                    | 8857       | Y     | Fungi         | <i>Phyl. citricarpa</i>                  | 50 µL (concentration N.M.) = 35%                             | Toffano et al., 2017   |
| ethyl caprate                             | ester                    | 8048       | Y     | Fungi         | <i>Bo. cinerea</i>                       | 1250 µL/L = 34%                                              | Guo et al., 2019       |
| ethyl caprylate                           | ester                    | 7799       | Y     | Fungi         | <i>Bo. cinerea</i>                       | 125 µL/L = 100%                                              | Guo et al., 2019       |
| ethyl cinnamate                           | alkyl cinnamate / ester  | 637758     | N     | Fungi         | <i>Bo. cinerea</i>                       | 1250 µL/L = 71%                                              | Guo et al., 2019       |
| ethyl octanoate                           | ester                    | 7799       | Y     | Fungi         | <i>Phyl. citricarpa</i>                  | 50 µL (concentration N.M.) = 56%                             | Toffano et al., 2017   |
| ethyl phenylacetate                       | benzenoid / ester        | 7590       | N     | Bacteria      | <i>Per. litchii</i>                      | 500 µL/L (volume N.M.) = 100%                                | Xing et al., 2018      |
| ethyl propionate                          | ester                    | 7749       | Y     | Fungi         | <i>Bo. cinerea</i>                       | 625 µL/L = 100%                                              | Guo et al., 2019       |
| ethyl-2-methylbutyrate                    | ester                    | 24020      | Y     | Fungi         | <i>Bo. cinerea</i>                       | 625 µL/L = 100%                                              | Guo et al., 2019       |
| ethyl-3-hydroxyhexanoate                  | ester / alcohol          | 61293      | N     | Fungi         | <i>Bo. cinerea</i>                       | 1250 µL/L = 95%                                              | Guo et al., 2019       |
| ethylbenzene                              | benzenoid / alkylbenzene | 7500       | Y     | Bacteria      | <i>F. oxysporum</i> f. sp. <i>niveum</i> | 200 µL (concentration N.M.) = 62%                            | Raza et al., 2015      |
| ethylbenzene                              | benzenoid / alkylbenzene | 7500       | Y     | Bacteria      | <i>Ra. solanacearum</i>                  | 40 µg/100µL (methanol) = ±50%                                | Raza et al., 2016a     |
| heptadecane                               | alkane                   | 12398      | Y     | Bacteria      | <i>F. oxysporum</i> f. sp. <i>niveum</i> | 200 µL (concentration N.M.) = 15%                            | Raza et al., 2015      |
| hexadecanal                               | aldehyde                 | 984        | N     | Bacteria      | <i>F. oxysporum</i> f. sp. <i>niveum</i> | 200 µL (concentration N.M.) = 100%                           | Raza et al., 2015      |
| hexadecane                                | alkane                   | 11006      | Y     | Bacteria      | <i>Burs. xylophilus</i>                  | 2.0 mmol = 22%                                               | Gu et al., 2007        |
| hexadecane                                | alkane                   | 11006      | Y     | Bacteria      | <i>F. oxysporum</i> f. sp. <i>niveum</i> | 200 µL (concentration N.M.) = 20%                            | Raza et al., 2015      |
| hexanedioic acid, bis(2-ethylhexyl) ester | diester                  | 7641       | N     | Bacteria      | <i>Co. gloeosporioides</i>               | 200 µL (200 µL/mL liquid or 100 mg/mL solid compounds) = 11% | Rajaofera et al., 2019 |
| hexanoic acid                             | acid / carboxylic acid   | 8892       | Y     | Fungi         | <i>Bo. cinerea</i>                       | 625 µL/L = 100%                                              | Guo et al., 2019       |

| Compounds                 | Chemical classes                              | PubChem ID | mVOC* | Identified in | phytopathogen inhibited                  | Inhibitory concentrations                                   | References                  |
|---------------------------|-----------------------------------------------|------------|-------|---------------|------------------------------------------|-------------------------------------------------------------|-----------------------------|
| hexyl alcohol             | alcohol                                       | 8103       | Y     | Fungi         | <i>Bo. cinerea</i>                       | 625 µL/L = 100%                                             | Guo et al., 2019            |
| indole                    | indole / nitrogen compound                    | 798        | Y     | Bacteria      | <i>F. oxysporum</i> f. sp. <i>niveum</i> | 200 µL (concentration N.M.) = 60%                           | Raza et al., 2015           |
| isoamyl acetate           | ester                                         | 31276      | Y     | Fungi         | <i>Bo. cinerea</i>                       | 625 µL/L = 100%                                             | Guo et al., 2019            |
| isoamyl propionate        | ester                                         | 7772       | Y     | Bacteria      | <i>Phyt. capsici</i>                     | 10 µg/mL (volume N.M.) = 35% inhibition                     | Syed-Ab-Rahman et al., 2019 |
| isobutyl acetate          | ester                                         | 8038       | Y     | Fungi         | <i>Bo. cinerea</i>                       | 625 µL/L = 100%                                             | Guo et al., 2019            |
| isovaleric acid           | carboxylic acid                               | 10430      | N     | Bacteria      | <i>Co. lindemuthianum</i>                | 10 µL (102.3 g/mol) = up to 94%                             | Martins et al., 2019        |
| isovaleric acid           | carboxylic acid                               | 10430      | N     | Bacteria      | <i>Phyt. capsici</i>                     | 10 µg/mL (volume N.M.) = ± 40% inhibition                   | Syed-Ab-Rahman et al., 2019 |
| lauric acid               | carboxylic acid                               | 3893       | Y     | Fungi         | <i>Bo. cinerea</i>                       | 100 mg/L = 11%                                              | Guo et al., 2019            |
| <i>m</i> -cymene          | benzenoid / terpene                           | 10812      | Y     | Bacteria      | <i>S. sclerotiorum</i>                   | mycelium MIQ = 13.77 mg<br>sclerotia MIQ = 17.22 mg         | Giorgio et al., 2015        |
| methyl anthranilate       | benzenoid / amine / ester / nitrogen compound | 8635       | Y     | Bacteria      | <i>Per. litchii</i>                      | 1000 µL/L (volume N.M.) = mycelia reduced in 38.7 mm (±76%) | Xing et al., 2018           |
| methyl jasmonate          | jasmonate derivate / ester                    | 5281929    | N     | Bacteria      | <i>Per. litchii</i>                      | EC50 = 206.96 mg/L                                          | Zheng et al., 2019a         |
| methyl salicylate         | benzenoid / ester / alcohol                   | 4133       | Y     | Bacteria      | <i>Per. litchii</i>                      | 200 µL/L (volume N.M.) = 100%                               | Xing et al., 2018           |
| Methyl vinyl ketone       | ketone                                        | 6570       | N     | Bacteria      | <i>Cladosporium cladosporioides</i>      | 0,22 mg/L = 99%                                             | Herrington et al., 1987     |
| methyl-1-butanol          | alcohol                                       | 22386      | Y     | Fungi         | <i>Phyl. citricarpa</i>                  | 50 µL (concentration N.M.) = 100%                           | Toffano et al., 2017        |
| methyl-2-methylpentanoate | ester                                         | 519890     | Y     | Bacteria      | <i>Rh. solani</i>                        | 1M = 47% (1 day) and 25% (2 days)                           | Cordovez et al., 2015       |

| Compounds           | Chemical classes          | PubChem ID | mVOC* | Identified in | phytopathogen inhibited                            | Inhibitory concentrations                                                               | References           |
|---------------------|---------------------------|------------|-------|---------------|----------------------------------------------------|-----------------------------------------------------------------------------------------|----------------------|
| methylamine         | amine / nitrogen compound | 6329       | Y     | Bacteria      | <i>Burkholderia arboris</i>                        | MVIC = 20 mM                                                                            | Sannino et al., 2017 |
| methylamine         | amine / nitrogen compound | 6329       | Y     | Bacteria      | <i>Burkholderia cenocepacia</i>                    | MVIC = 10 mM                                                                            | Sannino et al., 2017 |
| methylamine         | amine / nitrogen compound | 6329       | Y     | Bacteria      | <i>Burkholderia contaminans</i>                    | MVIC = 20 mM                                                                            | Sannino et al., 2017 |
| methylamine         | amine / nitrogen compound | 6329       | Y     | Bacteria      | <i>Burkholderia latens</i>                         | MVIC > 35 mM                                                                            | Sannino et al., 2017 |
| methylamine         | amine / nitrogen compound | 6329       | Y     | Bacteria      | <i>Burkholderia metallica</i>                      | MVIC = 20 mM                                                                            | Sannino et al., 2017 |
| methylamine         | amine / nitrogen compound | 6329       | Y     | Bacteria      | <i>Burkholderia multivorans</i>                    | MVIC = 20 mM                                                                            | Sannino et al., 2017 |
| methylamine         | amine / nitrogen compound | 6329       | Y     | Bacteria      | <i>Burkholderia pseudomultivorans</i>              | MVIC = 20 mM                                                                            | Sannino et al., 2017 |
| methylamine         | amine / nitrogen compound | 6329       | Y     | Bacteria      | <i>Burkholderia stabilis</i>                       | MVIC = 20 mM                                                                            | Sannino et al., 2017 |
| methylamine         | amine / nitrogen compound | 6329       | Y     | Bacteria      | <i>Burkholderia ubonensis</i>                      | MVIC = 20 mM                                                                            | Sannino et al., 2017 |
| methylamine         | amine / nitrogen compound | 6329       | Y     | Bacteria      | <i>Po. chlamydosporia</i>                          | spore: 9 mg/L ≥ 99%<br>mycelium: 33 mg/L ≥ 99%                                          | Zou et al., 2007     |
| methylamine         | amine / nitrogen compound | 6329       | Y     | Bacteria      | <i>Pa. lilacinus</i>                               | spore: 7 mg/L ≥ 99%<br>mycelium: 21 mg/L ≥ 99%                                          | Zou et al., 2007     |
| m-xylene            | benzenoid / alkylbenzene  | 7929       | Y     | Bacteria      | <i>Ra. solanacearum</i>                            | 40 µg/100µL (methanol) = ±50%                                                           | Raza et al., 2016a   |
| n-hexadecanoic acid | carboxylic acid           | 985        | Y     | Bacteria      | <i>F. oxysporum</i> f. sp. <i>niveum</i>           | 200 µL (concentration N.M.) = 35%                                                       | Raza et al., 2015    |
| nonadecane          | alkane                    | 12401      | Y     | Bacteria      | <i>F. oxysporum</i> f. sp. <i>niveum</i>           | 200 µL (concentration N.M.) = 10%                                                       | Raza et al., 2015    |
| nonadecanone        | ketone                    | 137263     | N     | Bacteria      | <i>F. oxysporum</i> f. sp. <i>niveum</i>           | 200 µL (concentration N.M.) = 4%                                                        | Raza et al., 2015    |
| nonanal             | aldehyde                  | 31289      | Y     | Bacteria      | <i>Cl. michiganensis</i> subsp. <i>sepedonicus</i> | 100 µl (10 and 100 µL/mL and undiluted) = cell viability reduced in up to ±5 log CFU/mL | Rajer et al., 2017   |



| Compounds                            | Chemical classes         | PubChem ID | mVOC* | Identified in | phytopathogen inhibited                  | Inhibitory concentrations                                    | References                 |
|--------------------------------------|--------------------------|------------|-------|---------------|------------------------------------------|--------------------------------------------------------------|----------------------------|
| nonanal                              | aldehyde                 | 31289      | Y     | Bacteria      | <i>F. oxysporum</i> f. sp. <i>niveum</i> | 200 µL (concentration N.M.) = 100%                           | Raza et al., 2015          |
| nonanal                              | aldehyde                 | 31289      | Y     | Bacteria      | <i>S. sclerotiorum</i>                   | 100 and 150 µL (concentration N.M.) = 100%                   | Fernando et al., 2005      |
| nonane                               | alkane                   | 8141       | Y     | Bacteria      | <i>Burs. xylophilus</i>                  | 2.0 mmol = 79%                                               | Gu et al., 2007            |
| nonanoic acid                        | carboxylic acid          | 8158       | Y     | Bacteria      | <i>F. oxysporum</i> f. sp. <i>niveum</i> | 200 µL (concentration N.M.) = 35%                            | Raza et al., 2015          |
| ocimene                              | terpene                  | 5281553    | Y     | Fungi         | <i>F. oxysporum</i>                      | 1000 µg/mL = ± 20%                                           | Medina-Romero et al., 2017 |
| octadecane                           | alkane                   | 11635      | Y     | Bacteria      | <i>Co. gloeosporioides</i>               | 200 µL (200 µL/mL liquid or 100 mg/mL solid compounds) = 29% | Rajaofera et al., 2019     |
| oleic acid                           | carboxylic acid / alkene | 445639     | Y     | Bacteria      | <i>F. oxysporum</i> f. sp. <i>niveum</i> | 200 µL (concentration N.M.) = 20%                            | Raza et al., 2015          |
| pentadecane                          | alkane                   | 12391      | Y     | Bacteria      | <i>F. oxysporum</i> f. sp. <i>niveum</i> | 200 µL (concentration N.M.) = 20%                            | Raza et al., 2015          |
| phenol                               | benzenoid / alcohol      | 996        | Y     | Bacteria      | <i>Burs. xylophilus</i>                  | 1.71 mmol = 100%                                             | Gu et al., 2007            |
| phenol                               | benzenoid / alcohol      | 996        | Y     | Bacteria      | <i>F. oxysporum</i> f. sp. <i>niveum</i> | 200 µL (concentration N.M.) = 100%                           | Raza et al., 2015          |
| phenylacetaldehyde (benzacetaldhyde) | benzenoid / aldehyde     | 998        | Y     | Bacteria      | <i>Burs. xylophilus</i>                  | 0.85 mmol = 100%                                             | Gu et al., 2007            |
| phenylacetaldehyde                   | benzenoid / aldehyde     | 998        | Y     | Bacteria      | <i>Po. chlamydosporia</i>                | spore: 8 mg/L ≥ 99%<br>mycelium: 34 mg/L ≥ 99%               | Zou et al., 2007           |
| phenylacetaldehyde                   | benzenoid / aldehyde     | 998        | Y     | Bacteria      | <i>Pa. lilacinus</i>                     | spore: 6 mg/L ≥ 99%<br>mycelium: 17 mg/L ≥ 99%               | Zou et al., 2007           |
| phenylacetaldehyde                   | benzenoid / aldehyde     | 998        | Y     | Bacteria      | <i>T. ethacetica</i>                     | 5 mM = 100%                                                  | Freitas et al., 2022       |
| propanoic acid                       | carboxylic acid          | 1032       | Y     | Bacteria      | <i>Burs. xylophilus</i>                  | 2.0 mmol = 25%                                               | Gu et al., 2007            |

| Compounds          | Chemical classes                        | PubChem ID | mVOC* | Identified in | phytopathogen inhibited                       | Inhibitory concentrations              | References                 |
|--------------------|-----------------------------------------|------------|-------|---------------|-----------------------------------------------|----------------------------------------|----------------------------|
| propanone          | ketone                                  | 180        | Y     | Bacteria      | <i>Burs. xylophilus</i>                       | 2.0 mmol = 75%                         | Gu et al., 2007            |
| salicylic acid     | beta hydroxy acid / benzenoid           | 338        | N     | Bacteria      | <i>Per. litchii</i>                           | EC50 = 175.97 mg/L                     | Zheng et al., 2019a        |
| styrene            | alkene / benzenoid                      | 7501       | Y     | Bacteria      | <i>F. oxysporum</i> f. sp. <i>cucumerinum</i> | 80 µL (standard) = 15%                 | Wu et al., 2015            |
| styrene            | alkene / benzenoid                      | 7501       | Y     | Bacteria      | <i>S. sclerotiorum</i>                        | 80 µL (standard) = 51%                 | Wu et al., 2015            |
| terpineol          | alcohol / terpene                       | 17100      | Y     | Bacteria      | <i>Burs. xylophilus</i>                       | 2.0 mmol = 78%                         | Gu et al., 2007            |
| terpinolene        | terpene                                 | 11463      | Y     | Fungi         | <i>F. oxysporum</i>                           | 1000 µg/mL = ± 20%                     | Medina-Romero et al., 2017 |
| tetradecane        | alkane                                  | 12389      | Y     | Bacteria      | <i>Burs. xylophilus</i>                       | 2.0 mmol = 19%                         | Gu et al., 2007            |
| tetradecane        | alkane                                  | 12389      | Y     | Bacteria      | <i>F. oxysporum</i> f. sp. <i>cucumerinum</i> | 80 µL (standard) = 21%                 | Wu et al., 2015            |
| tetradecane        | alkane                                  | 12389      | Y     | Bacteria      | <i>F. oxysporum</i> f. sp. <i>niveum</i>      | 200 µL (concentration N.M.) = 30%      | Raza et al., 2015          |
| tetradecane        | alkane                                  | 12389      | Y     | Bacteria      | <i>S. sclerotiorum</i>                        | 80 µL (standard) = 13%                 | Wu et al., 2015            |
| tetradecanoic acid | carboxylic acid                         | 11005      | Y     | Bacteria      | <i>F. oxysporum</i> f. sp. <i>niveum</i>      | 200 µL (concentration N.M.) = 20%      | Raza et al., 2015          |
| tetradecanol       | alcohol                                 | 8209       | Y     | Bacteria      | <i>F. oxysporum</i> f. sp. <i>niveum</i>      | 200 µL (concentration N.M.) = 50%      | Raza et al., 2015          |
| thiophene          | thiophene / thioether / sulfur compound | 8030       | Y     | Bacteria      | <i>Bo. cinerea</i>                            | 1.35 µL/mL = 83%<br>EC50 = 6.67 µL/mL  | Gotor-Vila et al., 2017    |
| thiophene          | thiophene / thioether / sulfur compound | 8030       | Y     | Bacteria      | <i>Mo. fructicola</i>                         | 1.35 µL/mL = 100%<br>EC50 = 0.06 µL/mL | Gotor-Vila et al., 2017    |
| thiophene          | thiophene / thioether / sulfur compound | 8030       | Y     | Bacteria      | <i>Mo. laxa</i>                               | 1.35 µL/mL = 95%<br>EC50 = 2.62 µL/mL  | Gotor-Vila et al., 2017    |
| toluene            | benzenoid / alkylbenzene                | 1140       | Y     | Bacteria      | <i>F. oxysporum</i> f. sp. <i>cucumerinum</i> | 80 µL (standard) = 9%                  | Wu et al., 2015            |
| toluene            | benzenoid / alkylbenzene                | 1140       | Y     | Bacteria      | <i>F. oxysporum</i> f. sp. <i>niveum</i>      | 200 µL (concentration N.M.) = 100%     | Raza et al., 2015          |
| toluene            | benzenoid / alkylbenzene                | 1140       | Y     | Bacteria      | <i>Ra. solanacearum</i>                       | 40 µg/100µL (methanol) = ±50%          | Raza et al., 2016a         |

| Compounds                                                                                                                                             | Chemical classes                                           | PubChem ID                                              | mVOC*                               | Identified in | phytopathogen inhibited                  | Inhibitory concentrations                                                                                      | References            |
|-------------------------------------------------------------------------------------------------------------------------------------------------------|------------------------------------------------------------|---------------------------------------------------------|-------------------------------------|---------------|------------------------------------------|----------------------------------------------------------------------------------------------------------------|-----------------------|
| toluene                                                                                                                                               | benzenoid / alkylbenzene                                   | 1140                                                    | Y                                   | Bacteria      | <i>S. sclerotiorum</i>                   | 80 µL (standard) = 51%                                                                                         | Wu et al., 2015       |
| trans-cinnamaldehyde                                                                                                                                  | aldehyde / carboxylic acid / benzenoid                     | 637511                                                  | Y                                   | Fungi         | <i>Bo. cinerea</i>                       | 6.25 µL/L = 100%                                                                                               | Guo et al., 2019      |
| trimethyl pyrazine                                                                                                                                    | pyrazine / nitrogen compound / heterocyclic compound       | 26808                                                   | Y                                   | Bacteria      | <i>Burs. xylophilus</i>                  | 2.0 mmol = 13%                                                                                                 | Gu et al., 2007       |
| undecanal                                                                                                                                             | aldehyde                                                   | 8186                                                    | Y                                   | Bacteria      | <i>F. oxysporum</i> f. sp. <i>niveum</i> | 200 µL (concentration N.M.) = 100%                                                                             | Raza et al., 2015     |
| undecanoic acid                                                                                                                                       | carboxylic acid                                            | 8180                                                    | N                                   | Bacteria      | <i>F. oxysporum</i> f. sp. <i>niveum</i> | 200 µL (concentration N.M.) = 5%                                                                               | Raza et al., 2015     |
| xylene                                                                                                                                                | benzenoid                                                  | 7237                                                    | **                                  | Bacteria      | <i>F. oxysporum</i> f. sp. <i>niveum</i> | 200 µL (concentration N.M.) = 85%                                                                              | Raza et al., 2015     |
| VOC mixture: 1,3,5-trichloro-2-methoxybenzene (A); methyl butanoate (B); 3-octanone (C); methyl 2-methylpentanoate (D); methyl 3-methylpentanoate (E) | benzenoid (A); ester (B); ketone (C); ester (D); ester (E) | 6884 (A); 12180 (B); 246728 (C); 519890 (D); 519891 (E) | Y (A); ** (B); Y (C); Y (D); ** (E) | Bacteria      | <i>Rh. solani</i>                        | 200mM (final concentration) = 58% (1 day) and 42% (2 days)                                                     | Cordovez et al., 2015 |
| VOC mixture: acetoin (A); 2-methyl butyric acid (B)                                                                                                   | ketone (A); acid (B)                                       | 179 (A); 8314 (B)                                       | Y (A); Y (B)                        | Bacteria      | <i>Co. lindemuthianum</i>                | 10 µL of each compound (acetoin 88.8 g/mol, 2-methyl butyric acid 102.3 g/mol) = up to 94%                     | Martins et al., 2019  |
| VOC mixture: acetoin (A); isovaleric acid (B)                                                                                                         | ketone (A); acid (B)                                       | 179 (A); 10340 (B)                                      | Y (A); N (B)                        | Bacteria      | <i>Co. lindemuthianum</i>                | 10 µL of each compound (acetoin 88.8 g/mol, isovaleric acid 102.3 g/mol) = up to 94%                           | Martins et al., 2019  |
| VOC mixture: isovaleric acid (A); 2-methyl butyric acid (B)                                                                                           | acid (A); acid (B)                                         | 10430 (A); 8314 (B)                                     | N (A); Y (B)                        | Bacteria      | <i>Co. lindemuthianum</i>                | 10 µL of each compound (2-methyl butyric acid 102.3 g/mol, isovaleric acid 102.3 g/mol) = up to 94% inhibition | Martins et al., 2019  |

| Compounds                                                                                                                             | Chemical classes                                                                                | PubChem ID                                                      | mVOC*                                                    | Identified in | phytopathogen inhibited                    | Inhibitory concentrations                                                               | References                    |
|---------------------------------------------------------------------------------------------------------------------------------------|-------------------------------------------------------------------------------------------------|-----------------------------------------------------------------|----------------------------------------------------------|---------------|--------------------------------------------|-----------------------------------------------------------------------------------------|-------------------------------|
| VOC mixture: benzaldehyde (A); 2-ethylhexan-1-ol (B); 2-decanone (C)                                                                  | benzenoid (A); alcohol (B); ketone (C)                                                          | 240 (A); 7720 (B); 12741 (C)                                    | Y (A);<br>Y (B);<br>Y (C)                                | Bacteria      | <i>Co. acutatum</i>                        | 20 µL (proportion of each compound relative to its GC peak area GC – 7:24:1) = 99%      | Che et al., 2017              |
| VOC mixture: 2-phenylethanol (A); 2-methyl-1-butanol (B); 3-methyl-1-butanol (C)                                                      | alcohol (A); alcohol (B); alcohol (C)                                                           | 6054 (A); 8723 (B); 31260 (C)                                   | Y (A);<br>Y (B);<br>Y (C)                                | Fungi         | <i>F. oxysporum</i>                        | 1000 µg/mL = 100%                                                                       | Medina-Romero et al., 2017    |
| VOC mixture: ethanol (A); ethyl acetate (B); 3-methyl-1-butanol (C); 2-methyl-1-butanol (D); 2-phenylethanol (E); ethyl octanoate (F) | alcohol (A); ester (B); alcohol (C); alcohol (D); alcohol (E); Ester (F)                        | 702 (A); 8857 (B); 31260 (C); 8723 (D); 6054 (E); 7799 (F)      | Y (A);<br>Y (B);<br>Y (C);<br>Y (D);<br>Y (E);<br>Y (F)  | Bacteria      | <i>Phyl. citricarpa</i>                    | 0.4 – 2.0 µ/mL at 4 – 12 days = up to 100% (0.8 – 2.0 µ/mL at 4 days)                   | Toffano et al., 2017          |
| VOC mixture: DMDS (A); S-methyl thioacetate (MTA) (B)                                                                                 | sulfide/thioether (A); thioester (B)                                                            | 12232 (A); 73750 (B)                                            | Y (A);<br>** (B)                                         | Bacteria      | <i>Py. ultimum</i>                         | 1 µl of each compound (MTA 11.4 µM, DMDS ± 11.1 µM) = ±27.0mm treated / control 45.0 mm | Ossowicki et al., 2017        |
| VOC mixture: DMDS (A); S-methyl thioacetate (MTA) (B)                                                                                 | sulfide/thioether (A); thioester (B)                                                            | 12232 (A); 73750 (B)                                            | Y (A);<br>** (B)                                         | Bacteria      | <i>Rh. solani</i>                          | 1 µl of each compound (MTA 11.4 µM, DMDS ± 11.1 µM) = ±29.0mm treated / control 45.0 mm | Ossowicki et al., 2017        |
| VOC mixture: 2-phenylethanol (A); 2-methyl-1-butanol(B); 3-methyl-1-butanol(C); eucalyptol (D); ocimene (E); terpinolene (F)          | alcohol/benzenoid(A); alcohol (B); alcohol(C); cyclic ether (D); alkatriene(E); monoterpene (F) | 6054 (A); 8723 (B); 31260 (C); 2758 (D); 5281553 (E); 11463 (F) | Y (A);<br>Y (B);<br>Y (C);<br>** (D);<br>Y (E);<br>Y (F) | Fungi         | <i>F. oxysporum</i>                        | 0.5 mL (125 and 250 µg/mL of each compound) = 100%                                      | Macías-Rubalcava et al., 2018 |
| VOC mixture: 2-phenylethanol (A); 2-methyl-1-butanol(B); 3-methyl-1-butanol(C); eucalyptol (D); ocimene (E); terpinolene (F)          | alcohol/benzenoid(A); alcohol (B); alcohol(C); cyclic ether (D); alkatriene(E); monoterpene (F) | 6054 (A); 8723 (B); 31260 (C); 2758 (D); 5281553 (E); 11463 (F) | Y (A);<br>Y (B);<br>Y (C);<br>** (D);<br>Y (E);<br>Y (F) | Fungi         | <i>F. oxysporum</i>                        | 1000 µg/mL = 100%                                                                       | Medina-Romero et al., 2017    |
| VOC mixture: acetaldehyde (A); ethyl acetate (B); 2-                                                                                  | aldehyde (A); ester (B); ketone (C); fatty acid                                                 | 177 (A); 8857 (B); 6569 (C);                                    | ** (A);<br>Y (B);                                        | Fungi         | <i>Py. ultimum, Bipolaris sorokiniana,</i> | 15uL (proportion according with the GC-                                                 | Mitchell et al., 2010         |

| Compounds                                                                                                                                                                                                                                                                                                                                                      | Chemical classes                                                                                                                                                              | PubChem ID                                                                                                | mVOC*                                                                             | Identified in | phytopathogen inhibited                                                                                                                                                                            | Inhibitory concentrations                                                                | References |
|----------------------------------------------------------------------------------------------------------------------------------------------------------------------------------------------------------------------------------------------------------------------------------------------------------------------------------------------------------------|-------------------------------------------------------------------------------------------------------------------------------------------------------------------------------|-----------------------------------------------------------------------------------------------------------|-----------------------------------------------------------------------------------|---------------|----------------------------------------------------------------------------------------------------------------------------------------------------------------------------------------------------|------------------------------------------------------------------------------------------|------------|
| butanone (C); propanoic acid, 2-methyl-, methyl ester (D); ethanol (E); acetic acid, 2-methylpropyl ester (F); 1-propanol, 2-methyl- (G); 2-butenal, 2-methyl-, (E)- (H); 1-butanol, 3-methyl-, acetate (I); propanoic acid, 2-methyl-, 3-methylbutyl ester (J); 1-butanol, 3-methyl- (K); propanoic acid, 2-methyl- (L); acetic acid, 2-phenylethyl ester (M) | methyl ester (D); alcohol (E); acetate ester (F); alcohol (G); aldehyde (H); acetate ester (I); fatty acid ester (J); alcohol (K); branched fatty acid (L); acetate ester (M) | 11039 (D); 702 (E); 8038 (F); 6560 (G); 5321950 (H); 31276 (I); 519786 (J); 31260 (K); 6590 (L); 7654 (M) | ** (C); ** (D); Y (E); Y (F); Y (G); ** (H); Y (I); ** (J); Y (K); ** (L); ** (M) |               | <i>Stagonospora</i> sp., <i>F. oxysporum</i> ; <i>F. solani</i> ; <i>Verticillium dahliae</i> ; <i>Bo. cinerea</i> ; <i>Aspergillus fumigatus</i> and many others (view reference for entire list) | MS peaks) = 100% for almost organisms (view reference for checking each inhibition rate) |            |

Notes: The inhibitory activity of each compound is expressed as it was reported by the respective authors. %: percentage of growth inhibition; MIQ: minimum inhibitory quantity; MIC: minimum inhibitory concentration; MVIC: minimum volatile inhibitory concentration; EC50 and EC95: effective concentrations causing 50 and 95% of inhibition, respectively; D.I: disease incidence; and N.M.: information is not mentioned. Only the most effective concentration tested is shown in the table, please consult the reference for other values or information. As we standardized the name of all compounds by the PUBCHEM ID, the compounds may appear with a different name than the reported in the original article.

\*mVOC column refers if the compound is (Y, yes) or is not (N, no) listed in the mVOC 2.0 Database (Lemfack et al., 2018).

\*\* mVOC database website was unavailable at the moment of the search for those compounds until the conclusion of this final draft.

## REFERENCES

- Agisha, V. N., Kumar, A., Eapen, S. J., Sheoran, N., and Suseelabhai, R. (2019). Broad-spectrum antimicrobial activity of volatile organic compounds from endophytic *Pseudomonas putida* BP25 against diverse plant pathogens. *Biocontrol Sci. Technol.* 29, 1069–1089. doi:10.1080/09583157.2019.1657067.
- Boukaew, S., and Prasertsan, P. (2018). Inhibitory effects of acetophenone or phenylethyl alcohol as fumigant to protect soybean seeds against two aflatoxin-producing fungi. *J. Food Sci. Technol.* 55, 5123–5132. doi:10.1007/s13197-018-3458-6.
- Che, J., Liu, B., Liu, G., Chen, Q., and Lan, J. (2017). Volatile organic compounds produced by *Lysinibacillus* sp. FJAT-4748 possess antifungal activity against *Colletotrichum acutatum*. *Biocontrol Sci. Technol.* 27, 1349–1362. doi:10.1080/09583157.2017.1397600.
- Cordovez, V., Carrion, V. J., Etalo, D. W., Mumm, R., Zhu, H., van Wezel, G. P., et al. (2015). Diversity and functions of volatile organic compounds produced by *Streptomyces* from a disease-suppressive soil. *Front. Microbiol.* 6, 1–13. doi:10.3389/fmicb.2015.01081.
- Dandurishvili, N., Toklikishvili, N., Ovadis, M., Eliashvili, P., Giorgobiani, N., Keshelava, R., et al. (2011). Broad-range antagonistic rhizobacteria *Pseudomonas fluorescens* and *Serratia plymuthica* suppress *Agrobacterium* crown gall tumours on tomato plants. *J. Appl. Microbiol.* 110, 341–352. doi:10.1111/j.1365-2672.2010.04891.x.
- Di Francesco, A., Di Foggia, M., and Baraldi, E. (2020). *Aureobasidium pullulans* volatile organic compounds as alternative postharvest method to control brown rot of stone fruits. *Food Microbiol.* 87, 103395. doi:10.1016/J.FM.2019.103395.
- Di Francesco, A., Milella, F., Mari, M., and Roberti, R. (2017). A preliminary investigation into *Aureobasidium pullulans* as a potential biocontrol agent against *Phytophthora infestans* of tomato. *Biol. Control* 114, 144–149. doi:10.1016/J.BIOCONTROL.2017.08.010.
- Di Francesco, A., Ugolini, L., Lazzeri, L., and Mari, M. (2015). Production of volatile organic compounds by *Aureobasidium pullulans* as a potential mechanism of action against postharvest fruit pathogens. *Biol. Control* 81, 8–14. doi:10.1016/j.biocontrol.2014.10.004.
- Dickschat, J. S., Martens, T., Brinkhoff, T., Simon, M., and Schulz, S. (2005). Volatiles released by a *Streptomyces* species isolated from the North Sea. *Chem. Biodivers.* 2, 837–865. doi:10.1002/cbdv.200590062.
- Fernando, W. G. D., Ramarathnam, R., Krishnamoorthy, A. S., and Savchuk, S. C. (2005). Identification and use of potential bacterial organic antifungal volatiles in biocontrol. *Soil Biol. Biochem.* 37, 955–964. doi:10.1016/j.soilbio.2004.10.021.
- Freitas, C. S. A., Maciel, L. F., Corrêa dos Santos, R. A., Costa, O. M. M. M., Maia, F. C. B., Rabelo, R. S., et al. (2022). Bacterial volatile organic compounds induce adverse ultrastructural changes and DNA damage to the sugarcane pathogenic fungus *Thielaviopsis ethacetica*. *Environ. Microbiol.* doi:10.1111/1462-2920.15876.
- Gao, H., Li, P., Xu, X., Zeng, Q., and Guan, W. (2018). Research on volatile organic compounds from *Bacillus subtilis* CF-3: biocontrol effects on fruit fungal pathogens and dynamic changes during fermentation. *Front. Microbiol.* 9. doi:10.3389/fmicb.2018.00456.
- Gao, Z., Zhang, B., Liu, H., Han, J., and Zhang, Y. (2017). Identification of endophytic *Bacillus*

*velezensis* ZSY-1 strain and antifungal activity of its volatile compounds against *Alternaria solani* and *Botrytis cinerea*. *Biol. Control* 105, 27–39. doi:10.1016/j.biocontrol.2016.11.007.

- Giorgio, A., De Stradis, A., Lo Cantore, P., and Iacobellis, N. S. (2015). Biocide effects of volatile organic compounds produced by potential biocontrol rhizobacteria on *Sclerotinia sclerotiorum*. *Front. Microbiol.* 6. doi:10.3389/fmicb.2015.01056.
- Gotor-Vila, A., Teixidó, N., Di Francesco, A., Usall, J., Ugolini, L., Torres, R., et al. (2017). Antifungal effect of volatile organic compounds produced by *Bacillus amyloliquefaciens* CPA-8 against fruit pathogen decays of cherry. *Food Microbiol.* 64, 219–225. doi:10.1016/j.fm.2017.01.006.
- Gu, Y. Q., Mo, M. H., Zhou, J. P., Zou, C. S., and Zhang, K. Q. (2007). Evaluation and identification of potential organic nematicidal volatiles from soil bacteria. *Soil Biol. Biochem.* 39, 2567–2575. doi:10.1016/j.soilbio.2007.05.011.
- Guevara-Avenidaño, E., Bejarano-Bolívar, A. A., Kiel-Martínez, A. L., Ramírez-Vázquez, M., Méndez-Bravo, A., von Wobeser, E. A., et al. (2019). Avocado rhizobacteria emit volatile organic compounds with antifungal activity against *Fusarium solani*, *Fusarium* sp. associated with Kuroshio shot hole borer, and *Colletotrichum gloeosporioides*. *Microbiol. Res.* 219, 74–83. doi:10.1016/j.micres.2018.11.009.
- Guo, H., Qin, X., Wu, Y., Yu, W., Liu, J., Xi, Y., et al. (2019). Biocontrol of gray mold of cherry tomatoes with the volatile organic monomer from *Hanseniaspora uvarum*, trans-cinnamaldehyde. *Food Bioprocess Technol.* 12, 1809–1820. doi:10.1007/s11947-019-02319-6.
- Han, S. H., Lee, S. J., Moon, J. H., Park, K. H., Yang, K. Y., Cho, B. H., et al. (2006). GacS-dependent production of 2R, 3R-butanediol by *Pseudomonas chlororaphis* O6 is a major determinant for eliciting systemic resistance against *Erwinia carotovora* but not against *Pseudomonas syringae* pv. *tabaci* in tobacco. *Mol. Plant-Microbe Interact.* 19, 924–930. doi:10.1094/MPMI-19-0924.
- Herrington, P. R., Craig, J. T., and Sheridan, J. E. (1987). Methyl vinyl ketone: a volatile fungistatic inhibitor from *Streptomyces griseoruber*. *Soil Biol. Biochem.* 19, 509–512. doi:10.1016/0038-0717(87)90092-7.
- Howell, C. R. (1988). Production of ammonia by *Enterobacter cloacae* and its possible role in the biological control of *Pythium* preemergence damping-off by the bacterium. *Phytopathology* 78, 1075. doi:10.1094/phyto-78-1075.
- Huang, J. S., Peng, Y. H., Chung, K. R., and Huang, J. W. (2018). Suppressive efficacy of volatile compounds produced by *Bacillus mycoides* on damping-off pathogens of cabbage seedlings. *J. Agric. Sci.* 156, 795–809. doi:10.1017/S0021859618000746.
- Kishimoto, K., Matsui, K., Ozawa, R., and Takabayashi, J. (2007). Volatile 1-octen-3-ol induces a defensive response in *Arabidopsis thaliana*. *J. Gen. Plant Pathol.* 73, 35–37. doi:10.1007/s10327-006-0314-8.
- Koitaishi, M., Kajitani, Y., and Hirashima, K. (2004). Antifungal substances produced by fungal strain Kyu-W63 from wheat leaf and its taxonomic position. *J. Gen. Plant Pathol.* 2004 702 70, 124–130. doi:10.1007/S10327-003-0095-2.

- Lemfack, M. C., Gohlke, B. O., Toguem, S. M. T., Preissner, S., Piechulla, B., and Preissner, R. (2018). MVOC 2.0: A database of microbial volatiles. *Nucleic Acids Res.* 46, D1261–D1265. doi:10.1093/nar/gkx1016.
- Macías-Rubalcava, M. L., Sánchez-Fernández, R. E., Roque-Flores, G., Lappe-Oliveras, P., and Medina-Romero, Y. M. (2018). Volatile organic compounds from *Hypoxyylon anthochroum* endophytic strains as postharvest mycofumigation alternative for cherry tomatoes. *Food Microbiol.* 76, 363–373. doi:10.1016/j.fm.2018.06.014.
- Martins, S. J., Faria, A. F., Pedroso, M. P., Cunha, M. G., Rocha, M. R., and Medeiros, F. H. V. (2019). Microbial volatiles organic compounds control anthracnose (*Colletotrichum lindemuthianum*) in common bean (*Phaseolus vulgaris* L.). *Biol. Control* 131, 36–42. doi:10.1016/j.biocontrol.2019.01.003.
- Medina-Romero, Y. M., Roque-Flores, G., and Macías-Rubalcava, M. L. (2017). Volatile organic compounds from endophytic fungi as innovative postharvest control of *Fusarium oxysporum* in cherry tomato fruits. *Appl. Microbiol. Biotechnol.* 101, 8209–8222. doi:10.1007/s00253-017-8542-8.
- Mitchell, A. M., Strobel, G. A., Moore, E., Robison, R., and Sears, J. (2010). Volatile antimicrobials from *Muscodor crispans*, a novel endophytic fungus. *Microbiology* 156, 270–277. doi:10.1099/mic.0.032540-0.
- Munjal, V., Nadakkakath, A. V., Sheoran, N., Kundu, A., Venugopal, V., Subaharan, K., et al. (2016). Genotyping and identification of broad spectrum antimicrobial volatiles in black pepper root endophytic biocontrol agent, *Bacillus megaterium* BP17. *Biol. Control* 92, 66–76. doi:10.1016/j.biocontrol.2015.09.005.
- Ossowicki, A., Jafra, S., and Garbeva, P. (2017). The antimicrobial volatile power of the rhizospheric isolate *Pseudomonas donghuensis* P482. *PLoS One* 12, e0174362. doi:10.1371/journal.pone.0174362.
- Plyuta, V., Lipasova, V., Popova, A., Koksharova, O., Kuznetsov, A., Szegedi, E., et al. (2016). Influence of volatile organic compounds emitted by *Pseudomonas* and *Serratia* strains on *Agrobacterium tumefaciens* biofilms. *APMIS* 124, 586–594. doi:10.1111/APM.12547.
- Popova, A. A., Koksharova, O. A., Lipasova, V. A., Zaitseva, J. V., Katkova-Zhukotskaya, O. A., Eremina, S. I., et al. (2014). Inhibitory and toxic effects of volatiles emitted by strains of *Pseudomonas* and *Serratia* on growth and survival of selected microorganisms, *Caenorhabditis elegans*, and *Drosophila melanogaster*. *Biomed Res. Int.* 2014. doi:10.1155/2014/125704.
- Rajaofera, M. J. N., Wang, Y., Dahar, G. Y., Jin, P., Fan, L., Xu, L., et al. (2019). Volatile organic compounds of *Bacillus atrophaeus* HAB-5 inhibit the growth of *Colletotrichum gloeosporioides*. *Pestic. Biochem. Physiol.* 156, 170–176. doi:10.1016/j.pestbp.2019.02.019.
- Rajer, F. U., Wu, H., Xie, Y., Xie, S., Raza, W., Tahir, H. A. S., et al. (2017). Volatile organic compounds produced by a soil-isolate, *Bacillus subtilis* FA26 induce adverse ultra-structural changes to the cells of *Clavibacter michiganensis* ssp. *Sepedonicus*, the causal agent of bacterial ring rot of potato. *Microbiol. (United Kingdom)* 163, 523–530. doi:10.1099/mic.0.000451.



- Raza, W., Ling, N., Liu, D., Wei, Z., Huang, Q., and Shen, Q. (2016). Volatile organic compounds produced by *Pseudomonas fluorescens* WR-1 restrict the growth and virulence traits of *Ralstonia solanacearum*. *Microbiol. Res.* 192, 103–113. doi:10.1016/j.micres.2016.05.014.
- Raza, W., Yuan, J., Ling, N., Huang, Q., and Shen, Q. (2015). Production of volatile organic compounds by an antagonistic strain *Paenibacillus polymyxa* WR-2 in the presence of root exudates and organic fertilizer and their antifungal activity against *Fusarium oxysporum* f. sp. *niveum*. *Biol. Control* 80, 89–95. doi:10.1016/j.biocontrol.2014.09.004.
- Rojas-Solís, D., Zetter-Salmón, E., Contreras-Pérez, M., Rocha-Granados, M. del C., Macías-Rodríguez, L., and Santoyo, G. (2018). *Pseudomonas stutzeri* E25 and *Stenotrophomonas maltophilia* CR71 endophytes produce antifungal volatile organic compounds and exhibit additive plant growth-promoting effects. *Biocatal. Agric. Biotechnol.* 13, 46–52. doi:10.1016/j.bcab.2017.11.007.
- Ryu, C. M., Farag, M. A., Hu, C. H., Reddy, M. S., Kloepper, J. W., and Paré, P. W. (2004). Bacterial volatiles induce systemic resistance in *Arabidopsis*. *Plant Physiol.* 134, 1017–1026. doi:10.1104/pp.103.026583.
- Sannino, F., Parrilli, E., Apuzzo, G. A., de Pascale, D., Tedesco, P., Maida, I., et al. (2017). *Pseudoalteromonas haloplanktis* produces methylamine, a volatile compound active against *Burkholderia cepacia* complex strains. *N. Biotechnol.* 35, 13–18. doi:10.1016/j.nbt.2016.10.009.
- Syed-Ab-Rahman, S. F., Carvalhais, L. C., Chua, E. T., Chung, F. Y., Moyle, P. M., Eltanahy, E. G., et al. (2019). Soil bacterial diffusible and volatile organic compounds inhibit *Phytophthora capsici* and promote plant growth. *Sci. Total Environ.* 692, 267–280. doi:10.1016/j.scitotenv.2019.07.061.
- Tahir, H. A. S., Gu, Q., Wu, H., Niu, Y., Huo, R., and Gao, X. (2017). *Bacillus* volatiles adversely affect the physiology and ultra-structure of *Ralstonia solanacearum* and induce systemic resistance in tobacco against bacterial wilt. *Sci. Rep.* 7, 1–15. doi:10.1038/srep40481.
- Toffano, L., Fialho, M. B., and Pascholati, S. F. (2017). Potential of fumigation of orange fruits with volatile organic compounds produced by *Saccharomyces cerevisiae* to control citrus black spot disease at postharvest. *Biol. Control* 108, 77–82. doi:10.1016/j.biocontrol.2017.02.009.
- Vlassi, A., Nesler, A., Perazzolli, M., Lazazzara, V., Büschl, C., Parich, A., et al. (2020). Volatile organic compounds from *Lysobacter capsici* AZ78 as potential candidates for biological control of soilborne plant pathogens. *Front. Microbiol.* 0, 1748. doi:10.3389/FMICB.2020.01748.
- Wolfgang, A., Taffner, J., Guimarães, R. A., Coyne, D., and Berg, G. (2019). Novel strategies for soil-borne diseases: Exploiting the microbiome and volatile-based mechanisms toward controlling *Meloidogyne*-based disease complexes. *Front. Microbiol.* 10, 1–15. doi:10.3389/fmicb.2019.01296.
- Wu, Y., Yuan, J., E, Y., Raza, W., Shen, Q., and Huang, Q. (2015). Effects of volatile organic compounds from *Streptomyces albulus* NJZSA2 on growth of two fungal pathogens. *J.*

*Basic Microbiol.* 55, 1104–1117. doi:10.1002/jobm.201400906.

- Xing, M., Zheng, L., Deng, Y., Xu, D., Xi, P., Li, M., et al. (2018). Antifungal activity of natural volatile organic compounds against litchi downy blight pathogen *Peronophythora litchii*. *Molecules* 23, 358. doi:10.3390/molecules23020358.
- Zhao, L. jing, Yang, X. nan, Li, X. ying, Mu, W., and Liu, F. (2011). Antifungal, insecticidal and herbicidal properties of volatile components from *Paenibacillus polymyxa* strain BMP-11. *Agric. Sci. China* 10, 728–736. doi:10.1016/S1671-2927(11)60056-4.
- Zheng, L., Situ, J. jian, Zhu, Q. feng, Xi, P. gen, Zheng, Y., Liu, H. xia, et al. (2019). Identification of volatile organic compounds for the biocontrol of postharvest litchi fruit pathogen *Peronophythora litchii*. *Postharvest Biol. Technol.* 155, 37–46. doi:10.1016/j.postharvbio.2019.05.009.
- Zhou, M., Li, P., Wu, S., Zhao, P., and Gao, H. (2019). *Bacillus subtilis* CF-3 volatile organic compounds inhibit *Monilinia fructicola* growth in peach fruit. *Front. Microbiol.* 10. doi:10.3389/fmicb.2019.01804.
- Zhou, Y., Li, W., Zeng, J., and Shao, Y. (2018). Mechanisms of action of the yeast *Debaryomyces nepalensis* for control of the pathogen *Colletotrichum gloeosporioides* in mango fruit. *Biol. Control* 123, 111–119. doi:10.1016/j.biocontrol.2018.05.014.
- Zou, C. S., Mo, M. H., Gu, Y. Q., Zhou, J. P., and Zhang, K. Q. (2007). Possible contributions of volatile-producing bacteria to soil fungistasis. *Soil Biol. Biochem.* 39, 2371–2379. doi:10.1016/j.soilbio.2007.04.009.
